# Supplementary material
Source: publisher figshare collection journal article supplement (https://acs.figshare.com/ndownloader/files/7833514)
Supplement: Supplementary file 1 [file 7833514]

data_3_1148j
 
_audit_creation_method            SHELXL-97
_chemical_name_systematic
;
 ?
;
_chemical_name_common             ?
_chemical_melting_point           ?
_chemical_formula_moiety          ?
_chemical_formula_sum
 'C24 H60 N2 O6 Si8 Zn'
_chemical_formula_weight          762.83
 
loop_
 _atom_type_symbol
 _atom_type_description
 _atom_type_scat_dispersion_real
 _atom_type_scat_dispersion_imag
 _atom_type_scat_source
 'C'  'C'   0.0033   0.0016
 'International Tables Vol C Tables 4.2.6.8 and 6.1.1.4'
 'H'  'H'   0.0000   0.0000
 'International Tables Vol C Tables 4.2.6.8 and 6.1.1.4'
 'N'  'N'   0.0061   0.0033
 'International Tables Vol C Tables 4.2.6.8 and 6.1.1.4'
 'O'  'O'   0.0106   0.0060
 'International Tables Vol C Tables 4.2.6.8 and 6.1.1.4'
 'Si'  'Si'   0.0817   0.0704
 'International Tables Vol C Tables 4.2.6.8 and 6.1.1.4'
 'Zn'  'Zn'   0.2839   1.4301
 'International Tables Vol C Tables 4.2.6.8 and 6.1.1.4'
 
_symmetry_cell_setting            monoclinic
_symmetry_space_group_name_H-M    C2/c
 
loop_
 _symmetry_equiv_pos_as_xyz
 'x, y, z'
 '-x, y, -z+1/2'
 'x+1/2, y+1/2, z'
 '-x+1/2, y+1/2, -z+1/2'
 '-x, -y, -z'
 'x, -y, z-1/2'
 '-x+1/2, -y+1/2, -z'
 'x+1/2, -y+1/2, z-1/2'
 
_cell_length_a                    22.934(7)
_cell_length_b                    11.727(3)
_cell_length_c                    15.772(4)
_cell_angle_alpha                 90.00
_cell_angle_beta                  103.317(7)
_cell_angle_gamma                 90.00
_cell_volume                      4127.9(19)
_cell_formula_units_Z             4
_cell_measurement_temperature     100(2)
_cell_measurement_reflns_used     6538
_cell_measurement_theta_min       4.477
_cell_measurement_theta_max       52.527
 
_exptl_crystal_description        plates
_exptl_crystal_colour             colorless
_exptl_crystal_size_max           0.18
_exptl_crystal_size_mid           0.12
_exptl_crystal_size_min           0.05
_exptl_crystal_density_meas       ?
_exptl_crystal_density_diffrn     1.227
_exptl_crystal_density_method     'not measured'
_exptl_crystal_F_000              1632
_exptl_absorpt_coefficient_mu     0.861
_exptl_absorpt_correction_type    multi-scan
_exptl_absorpt_correction_T_min   0.8604
_exptl_absorpt_correction_T_max   0.9582
_exptl_absorpt_process_details    SADABS
 
_exptl_special_details
;
 ?
;
 
_diffrn_ambient_temperature       100(2)
_diffrn_radiation_wavelength      0.71073
_diffrn_radiation_type            MoK\a
_diffrn_radiation_source          'fine-focus sealed tube'
_diffrn_radiation_monochromator   graphite
_diffrn_measurement_device_type   'SMART APEX' 
_diffrn_measurement_method        '\w scans'
_diffrn_detector_area_resol_mean  ?
_diffrn_standards_number          ?
_diffrn_standards_interval_count  ?
_diffrn_standards_interval_time   ?
_diffrn_standards_decay_%         ?
_diffrn_reflns_number             16118
_diffrn_reflns_av_R_equivalents   0.0352
_diffrn_reflns_av_sigmaI/netI     0.0320
_diffrn_reflns_limit_h_min        -28
_diffrn_reflns_limit_h_max        28
_diffrn_reflns_limit_k_min        -14
_diffrn_reflns_limit_k_max        14
_diffrn_reflns_limit_l_min        -19
_diffrn_reflns_limit_l_max        19
_diffrn_reflns_theta_min          1.82
_diffrn_reflns_theta_max          26.38
_reflns_number_total              4215
_reflns_number_gt                 3696
_reflns_threshold_expression      >2sigma(I)
 
_computing_data_collection        'Bruker XSCANS'
_computing_cell_refinement        'Bruker XSCANS'
_computing_data_reduction         'Bruker SHELXTL'
_computing_structure_solution     'SHELXS-97 (Sheldrick, 1990)'
_computing_structure_refinement   'SHELXL-97 (Sheldrick, 1997)'
_computing_molecular_graphics     'Bruker SHELXTL'
_computing_publication_material   'Bruker SHELXTL'
 
_refine_special_details
;
 Refinement of F^2^ against ALL reflections.  The weighted R-factor wR and
 goodness of fit S are based on F^2^, conventional R-factors R are based
 on F, with F set to zero for negative F^2^. The threshold expression of
 F^2^ > 2sigma(F^2^) is used only for calculating R-factors(gt) etc. and is
 not relevant to the choice of reflections for refinement.  R-factors based
 on F^2^ are statistically about twice as large as those based on F, and R-
 factors based on ALL data will be even larger.
;
 
_refine_ls_structure_factor_coef  Fsqd
_refine_ls_matrix_type            full
_refine_ls_weighting_scheme       calc
_refine_ls_weighting_details
 'calc w=1/[\s^2^(Fo^2^)+(0.0506P)^2^+23.6676P] where P=(Fo^2^+2Fc^2^)/3'
_atom_sites_solution_primary      direct
_atom_sites_solution_secondary    difmap
_atom_sites_solution_hydrogens    geom
_refine_ls_hydrogen_treatment     constr
_refine_ls_extinction_method      none
_refine_ls_extinction_coef        ?
_refine_ls_number_reflns          4215
_refine_ls_number_parameters      221
_refine_ls_number_restraints      28
_refine_ls_R_factor_all           0.0724
_refine_ls_R_factor_gt            0.0638
_refine_ls_wR_factor_ref          0.1443
_refine_ls_wR_factor_gt           0.1394
_refine_ls_goodness_of_fit_ref    1.079
_refine_ls_restrained_S_all       1.090
_refine_ls_shift/su_max           0.000
_refine_ls_shift/su_mean          0.000
 
loop_
 _atom_site_label
 _atom_site_type_symbol
 _atom_site_fract_x
 _atom_site_fract_y
 _atom_site_fract_z
 _atom_site_U_iso_or_equiv
 _atom_site_adp_type
 _atom_site_occupancy
 _atom_site_symmetry_multiplicity
 _atom_site_calc_flag
 _atom_site_refinement_flags
 _atom_site_disorder_assembly
 _atom_site_disorder_group
C2 C 0.1606(3) 0.3355(5) -0.0604(5) 0.066(3) Uani 0.686(11) 1 d PD A 1
H2A H 0.1391 0.3417 -0.1223 0.079 Uiso 0.686(11) 1 calc PR A 1
H2B H 0.1747 0.2560 -0.0486 0.079 Uiso 0.686(11) 1 calc PR A 1
C3 C 0.1186(4) 0.4145(4) 0.1367(8) 0.094(5) Uani 0.686(11) 1 d PD A 1
H3A H 0.1405 0.3995 0.1975 0.113 Uiso 0.686(11) 1 calc PR A 1
H3B H 0.0753 0.4124 0.1359 0.113 Uiso 0.686(11) 1 calc PR A 1
C4 C 0.1305(5) 0.3224(9) 0.0848(4) 0.078(3) Uani 0.686(11) 1 d PDU A 1
H4A H 0.1025 0.2585 0.0859 0.094 Uiso 0.686(11) 1 calc PR A 1
H4B H 0.1721 0.2946 0.1061 0.094 Uiso 0.686(11) 1 calc PR A 1
C22 C 0.1853(2) 0.3383(10) 0.0146(9) 0.030(4) Uani 0.314(11) 1 d PD A 2
H22A H 0.1901 0.2579 -0.0017 0.036 Uiso 0.314(11) 1 calc PR A 2
H22B H 0.2047 0.3485 0.0770 0.036 Uiso 0.314(11) 1 calc PR A 2
C33 C 0.1462(10) 0.4292(9) 0.1690(10) 0.052(5) Uani 0.314(11) 1 d PDU A 2
H33A H 0.1243 0.4238 0.2160 0.063 Uiso 0.314(11) 1 calc PR A 2
H33B H 0.1896 0.4144 0.1909 0.063 Uiso 0.314(11) 1 calc PR A 2
C44 C 0.118(2) 0.367(4) 0.0884(9) 0.19(3) Uani 0.314(11) 1 d PDU A 2
H44A H 0.1267 0.2858 0.1050 0.230 Uiso 0.314(11) 1 calc PR A 2
H44B H 0.0747 0.3762 0.0847 0.230 Uiso 0.314(11) 1 calc PR A 2
Zn1 Zn 0.2500 0.7500 0.0000 0.02783(18) Uani 1 2 d S . .
Si1 Si 0.15358(5) 0.75675(10) 0.02738(6) 0.0298(3) Uani 1 1 d . . .
Si2 Si 0.13326(5) 0.56044(10) 0.01357(9) 0.0395(3) Uani 1 1 d . A .
Si3 Si 0.15098(5) 0.82377(14) 0.16507(7) 0.0467(4) Uani 1 1 d . . .
Si4 Si 0.09273(5) 0.86125(8) -0.08319(6) 0.0251(2) Uani 1 1 d . . .
N1 N 0.12194(18) 0.3693(3) -0.0027(3) 0.0672(15) Uani 1 1 d D . .
O1 O 0.19484(14) 0.5283(3) -0.0221(3) 0.0549(9) Uani 1 1 d . . .
O2 O 0.13263(17) 0.5277(3) 0.1157(2) 0.0659(11) Uani 1 1 d D . .
O3 O 0.06786(13) 0.5577(2) -0.0589(2) 0.0459(8) Uani 1 1 d D . .
C1 C 0.21161(19) 0.4166(4) -0.0400(4) 0.0488(12) Uani 1 1 d D A .
H1A H 0.2416 0.3879 0.0110 0.059 Uiso 1 1 calc R B 1
H1B H 0.2310 0.4193 -0.0900 0.059 Uiso 1 1 calc R B 1
C5 C 0.0382(2) 0.4592(3) -0.0998(5) 0.103(3) Uani 1 1 d D A .
H5A H 0.0409 0.4579 -0.1615 0.123 Uiso 1 1 calc R . .
H5B H -0.0048 0.4633 -0.0986 0.123 Uiso 1 1 calc R . .
C6 C 0.0638(3) 0.3526(4) -0.0571(4) 0.082(2) Uani 1 1 d D A .
H6A H 0.0369 0.3222 -0.0216 0.098 Uiso 1 1 calc R . .
H6B H 0.0662 0.2954 -0.1023 0.098 Uiso 1 1 calc R . .
C7 C 0.2125(3) 0.7539(8) 0.2484(3) 0.103(3) Uani 1 1 d . . .
H7A H 0.2112 0.7811 0.3066 0.155 Uiso 1 1 calc R . .
H7B H 0.2514 0.7732 0.2363 0.155 Uiso 1 1 calc R . .
H7C H 0.2071 0.6710 0.2456 0.155 Uiso 1 1 calc R . .
C8 C 0.1625(3) 0.9814(6) 0.1737(4) 0.076(2) Uani 1 1 d . . .
H8A H 0.1291 1.0199 0.1341 0.114 Uiso 1 1 calc R . .
H8B H 0.2001 1.0011 0.1578 0.114 Uiso 1 1 calc R . .
H8C H 0.1643 1.0058 0.2336 0.114 Uiso 1 1 calc R . .
C9 C 0.0779(2) 0.7913(5) 0.1939(3) 0.0579(14) Uani 1 1 d . . .
H9A H 0.0790 0.8191 0.2529 0.087 Uiso 1 1 calc R . .
H9B H 0.0712 0.7087 0.1916 0.087 Uiso 1 1 calc R . .
H9C H 0.0453 0.8291 0.1524 0.087 Uiso 1 1 calc R . .
C10 C 0.1201(3) 1.0121(4) -0.0827(3) 0.0556(14) Uani 1 1 d . . .
H10A H 0.0939 1.0549 -0.1298 0.083 Uiso 1 1 calc R . .
H10B H 0.1611 1.0124 -0.0914 0.083 Uiso 1 1 calc R . .
H10C H 0.1197 1.0478 -0.0267 0.083 Uiso 1 1 calc R . .
C11 C 0.0132(2) 0.8674(5) -0.0740(3) 0.0516(12) Uani 1 1 d . . .
H11A H 0.0117 0.8934 -0.0155 0.077 Uiso 1 1 calc R . .
H11B H -0.0048 0.7914 -0.0842 0.077 Uiso 1 1 calc R . .
H11C H -0.0091 0.9207 -0.1174 0.077 Uiso 1 1 calc R . .
C12 C 0.0938(2) 0.7940(4) -0.1908(3) 0.0475(11) Uani 1 1 d . . .
H12A H 0.0783 0.7160 -0.1923 0.071 Uiso 1 1 calc R . .
H12B H 0.1350 0.7923 -0.1984 0.071 Uiso 1 1 calc R . .
H12C H 0.0687 0.8386 -0.2379 0.071 Uiso 1 1 calc R . .
 
loop_
 _atom_site_aniso_label
 _atom_site_aniso_U_11
 _atom_site_aniso_U_22
 _atom_site_aniso_U_33
 _atom_site_aniso_U_23
 _atom_site_aniso_U_13
 _atom_site_aniso_U_12
C2 0.050(5) 0.032(4) 0.121(9) 0.006(4) 0.028(5) 0.005(3)
C3 0.063(6) 0.138(11) 0.103(9) 0.114(8) 0.061(6) 0.075(6)
C4 0.066(5) 0.046(5) 0.105(6) 0.053(4) -0.016(4) -0.024(4)
C22 0.031(7) 0.017(6) 0.036(7) -0.003(5) -0.007(5) 0.011(5)
C33 0.063(9) 0.043(7) 0.045(8) 0.023(6) 0.001(6) 0.034(6)
C44 0.19(3) 0.18(3) 0.20(3) 0.015(10) 0.029(12) -0.004(10)
Zn1 0.0285(3) 0.0310(3) 0.0241(3) -0.0012(2) 0.0062(2) 0.0068(3)
Si1 0.0277(5) 0.0403(6) 0.0214(5) 0.0051(4) 0.0054(4) 0.0033(4)
Si2 0.0240(5) 0.0387(6) 0.0573(8) 0.0257(6) 0.0126(5) 0.0064(5)
Si3 0.0308(6) 0.0904(11) 0.0187(5) -0.0011(6) 0.0054(4) 0.0040(6)
Si4 0.0297(5) 0.0227(5) 0.0212(5) 0.0005(4) 0.0028(4) -0.0023(4)
N1 0.041(2) 0.036(2) 0.137(5) 0.029(3) 0.046(3) 0.0105(18)
O1 0.0351(17) 0.0369(17) 0.102(3) 0.0194(18) 0.0348(18) 0.0050(13)
O2 0.062(2) 0.071(3) 0.067(2) 0.045(2) 0.0203(19) 0.0048(19)
O3 0.0322(15) 0.0260(15) 0.075(2) 0.0063(15) 0.0043(15) 0.0027(12)
C1 0.030(2) 0.044(3) 0.076(3) -0.002(2) 0.020(2) 0.0002(19)
C5 0.027(3) 0.032(3) 0.234(10) -0.005(4) -0.002(4) -0.004(2)
C6 0.134(6) 0.033(3) 0.072(4) -0.003(3) 0.008(4) 0.003(3)
C7 0.061(4) 0.215(10) 0.026(3) 0.017(4) -0.003(2) 0.046(5)
C8 0.080(4) 0.106(5) 0.053(3) -0.042(3) 0.037(3) -0.034(4)
C9 0.045(3) 0.096(4) 0.039(3) 0.001(3) 0.021(2) -0.002(3)
C10 0.085(4) 0.036(3) 0.044(3) 0.005(2) 0.010(3) -0.022(3)
C11 0.034(2) 0.063(3) 0.056(3) 0.006(2) 0.007(2) 0.009(2)
C12 0.074(3) 0.046(3) 0.022(2) -0.0012(18) 0.009(2) -0.002(2)
 
_geom_special_details
;
 All esds (except the esd in the dihedral angle between two l.s. planes)
 are estimated using the full covariance matrix.  The cell esds are taken
 into account individually in the estimation of esds in distances, angles
 and torsion angles; correlations between esds in cell parameters are only
 used when they are defined by crystal symmetry.  An approximate (isotropic)
 treatment of cell esds is used for estimating esds involving l.s. planes.
;
 
loop_
 _geom_bond_atom_site_label_1
 _geom_bond_atom_site_label_2
 _geom_bond_distance
 _geom_bond_site_symmetry_2
 _geom_bond_publ_flag
C2 N1 1.465(2) . ?
C2 C1 1.484(2) . ?
C3 C4 1.419(15) . ?
C3 O2 1.424(2) . ?
C4 N1 1.457(2) . ?
C22 N1 1.461(2) . ?
C22 C1 1.480(13) . ?
C33 O2 1.420(2) . ?
C33 C44 1.480(2) . ?
C44 N1 1.461(2) . ?
Zn1 Si1 2.3500(12) . ?
Zn1 Si1 2.3500(12) 7_565 ?
Si1 Si4 2.3172(15) . ?
Si1 Si3 2.3231(16) . ?
Si1 Si2 2.3489(18) . ?
Si2 O2 1.658(4) . ?
Si2 O3 1.664(3) . ?
Si2 O1 1.679(3) . ?
Si2 N1 2.265(4) . ?
Si3 C8 1.868(7) . ?
Si3 C9 1.875(5) . ?
Si3 C7 1.880(6) . ?
Si4 C11 1.865(5) . ?
Si4 C10 1.877(4) . ?
Si4 C12 1.877(4) . ?
N1 C6 1.422(8) . ?
O1 C1 1.413(5) . ?
O3 C5 1.418(2) . ?
C5 C6 1.476(2) . ?
 
loop_
 _geom_angle_atom_site_label_1
 _geom_angle_atom_site_label_2
 _geom_angle_atom_site_label_3
 _geom_angle
 _geom_angle_site_symmetry_1
 _geom_angle_site_symmetry_3
 _geom_angle_publ_flag
N1 C2 C1 104.6(4) . . ?
C4 C3 O2 119.4(6) . . ?
C3 C4 N1 104.9(7) . . ?
N1 C22 C1 105.0(7) . . ?
O2 C33 C44 84(2) . . ?
N1 C44 C33 136.1(18) . . ?
Si1 Zn1 Si1 180.0 . 7_565 ?
Si4 Si1 Si3 112.58(6) . . ?
Si4 Si1 Si2 112.11(6) . . ?
Si3 Si1 Si2 111.78(7) . . ?
Si4 Si1 Zn1 107.97(5) . . ?
Si3 Si1 Zn1 114.27(5) . . ?
Si2 Si1 Zn1 97.18(5) . . ?
O2 Si2 O3 117.03(19) . . ?
O2 Si2 O1 118.00(19) . . ?
O3 Si2 O1 117.4(2) . . ?
O2 Si2 N1 81.64(18) . . ?
O3 Si2 N1 80.85(16) . . ?
O1 Si2 N1 79.82(15) . . ?
O2 Si2 Si1 100.52(16) . . ?
O3 Si2 Si1 102.19(11) . . ?
O1 Si2 Si1 94.97(12) . . ?
N1 Si2 Si1 174.77(11) . . ?
C8 Si3 C9 107.6(3) . . ?
C8 Si3 C7 108.0(4) . . ?
C9 Si3 C7 108.1(3) . . ?
C8 Si3 Si1 111.66(18) . . ?
C9 Si3 Si1 112.04(17) . . ?
C7 Si3 Si1 109.2(2) . . ?
C11 Si4 C10 107.2(3) . . ?
C11 Si4 C12 107.7(2) . . ?
C10 Si4 C12 109.0(2) . . ?
C11 Si4 Si1 113.10(16) . . ?
C10 Si4 Si1 110.65(17) . . ?
C12 Si4 Si1 109.10(16) . . ?
C6 N1 C4 115.0(5) . . ?
C6 N1 C44 109.3(17) . . ?
C4 N1 C44 24(2) . . ?
C6 N1 C22 146.3(7) . . ?
C4 N1 C22 79.5(7) . . ?
C44 N1 C22 95(2) . . ?
C6 N1 C2 101.9(5) . . ?
C4 N1 C2 121.2(7) . . ?
C44 N1 C2 142(2) . . ?
C22 N1 C2 47.9(6) . . ?
C6 N1 Si2 105.7(3) . . ?
C4 N1 Si2 106.2(5) . . ?
C44 N1 Si2 86.6(17) . . ?
C22 N1 Si2 98.2(5) . . ?
C2 N1 Si2 105.6(3) . . ?
C1 O1 Si2 124.3(3) . . ?
C33 O2 C3 30.0(7) . . ?
C33 O2 Si2 135.5(8) . . ?
C3 O2 Si2 119.7(5) . . ?
C5 O3 Si2 126.2(3) . . ?
O1 C1 C22 107.0(5) . . ?
O1 C1 C2 113.6(4) . . ?
C22 C1 C2 47.3(5) . . ?
O3 C5 C6 112.5(4) . . ?
N1 C6 C5 112.3(5) . . ?
 
loop_
 _geom_torsion_atom_site_label_1
 _geom_torsion_atom_site_label_2
 _geom_torsion_atom_site_label_3
 _geom_torsion_atom_site_label_4
 _geom_torsion
 _geom_torsion_site_symmetry_1
 _geom_torsion_site_symmetry_2
 _geom_torsion_site_symmetry_3
 _geom_torsion_site_symmetry_4
 _geom_torsion_publ_flag
O2 C3 C4 N1 -32.3(11) . . . . ?
O2 C33 C44 N1 46(6) . . . . ?
Si1 Zn1 Si1 Si4 151(13) 7_565 . . . ?
Si1 Zn1 Si1 Si3 25(13) 7_565 . . . ?
Si1 Zn1 Si1 Si2 -93(13) 7_565 . . . ?
Si4 Si1 Si2 O2 -135.16(14) . . . . ?
Si3 Si1 Si2 O2 -7.67(15) . . . . ?
Zn1 Si1 Si2 O2 112.09(14) . . . . ?
Si4 Si1 Si2 O3 -14.30(14) . . . . ?
Si3 Si1 Si2 O3 113.19(14) . . . . ?
Zn1 Si1 Si2 O3 -127.05(13) . . . . ?
Si4 Si1 Si2 O1 105.14(15) . . . . ?
Si3 Si1 Si2 O1 -127.38(15) . . . . ?
Zn1 Si1 Si2 O1 -7.61(15) . . . . ?
Si4 Si1 Si2 N1 110.8(16) . . . . ?
Si3 Si1 Si2 N1 -121.8(16) . . . . ?
Zn1 Si1 Si2 N1 -2.0(16) . . . . ?
Si4 Si1 Si3 C8 -49.3(2) . . . . ?
Si2 Si1 Si3 C8 -176.5(2) . . . . ?
Zn1 Si1 Si3 C8 74.4(2) . . . . ?
Si4 Si1 Si3 C9 71.5(2) . . . . ?
Si2 Si1 Si3 C9 -55.7(2) . . . . ?
Zn1 Si1 Si3 C9 -164.8(2) . . . . ?
Si4 Si1 Si3 C7 -168.7(3) . . . . ?
Si2 Si1 Si3 C7 64.1(3) . . . . ?
Zn1 Si1 Si3 C7 -45.1(3) . . . . ?
Si3 Si1 Si4 C11 -56.2(2) . . . . ?
Si2 Si1 Si4 C11 70.9(2) . . . . ?
Zn1 Si1 Si4 C11 176.76(19) . . . . ?
Si3 Si1 Si4 C10 64.1(2) . . . . ?
Si2 Si1 Si4 C10 -168.84(19) . . . . ?
Zn1 Si1 Si4 C10 -63.0(2) . . . . ?
Si3 Si1 Si4 C12 -175.99(17) . . . . ?
Si2 Si1 Si4 C12 -48.93(18) . . . . ?
Zn1 Si1 Si4 C12 56.94(18) . . . . ?
C3 C4 N1 C6 -94.2(7) . . . . ?
C3 C4 N1 C44 -13(3) . . . . ?
C3 C4 N1 C22 117.9(8) . . . . ?
C3 C4 N1 C2 142.5(7) . . . . ?
C3 C4 N1 Si2 22.3(8) . . . . ?
C33 C44 N1 C6 -141(5) . . . . ?
C33 C44 N1 C4 110(8) . . . . ?
C33 C44 N1 C22 62(6) . . . . ?
C33 C44 N1 C2 75(7) . . . . ?
C33 C44 N1 Si2 -36(6) . . . . ?
C1 C22 N1 C6 86.8(12) . . . . ?
C1 C22 N1 C4 -153.3(8) . . . . ?
C1 C22 N1 C44 -135.6(16) . . . . ?
C1 C22 N1 C2 55.4(6) . . . . ?
C1 C22 N1 Si2 -48.3(7) . . . . ?
C1 C2 N1 C6 142.2(5) . . . . ?
C1 C2 N1 C4 -88.5(7) . . . . ?
C1 C2 N1 C44 -73(2) . . . . ?
C1 C2 N1 C22 -55.0(7) . . . . ?
C1 C2 N1 Si2 32.0(6) . . . . ?
O2 Si2 N1 C6 113.3(4) . . . . ?
O3 Si2 N1 C6 -6.0(4) . . . . ?
O1 Si2 N1 C6 -126.1(4) . . . . ?
Si1 Si2 N1 C6 -131.8(14) . . . . ?
O2 Si2 N1 C4 -9.4(5) . . . . ?
O3 Si2 N1 C4 -128.6(5) . . . . ?
O1 Si2 N1 C4 111.2(5) . . . . ?
Si1 Si2 N1 C4 105.5(16) . . . . ?
O2 Si2 N1 C44 4(2) . . . . ?
O3 Si2 N1 C44 -115(2) . . . . ?
O1 Si2 N1 C44 125(2) . . . . ?
Si1 Si2 N1 C44 119(2) . . . . ?
O2 Si2 N1 C22 -90.7(6) . . . . ?
O3 Si2 N1 C22 150.0(6) . . . . ?
O1 Si2 N1 C22 29.8(6) . . . . ?
Si1 Si2 N1 C22 24.2(18) . . . . ?
O2 Si2 N1 C2 -139.2(4) . . . . ?
O3 Si2 N1 C2 101.5(4) . . . . ?
O1 Si2 N1 C2 -18.7(4) . . . . ?
Si1 Si2 N1 C2 -24.3(18) . . . . ?
O2 Si2 O1 C1 72.3(5) . . . . ?
O3 Si2 O1 C1 -76.5(4) . . . . ?
N1 Si2 O1 C1 -2.4(4) . . . . ?
Si1 Si2 O1 C1 177.0(4) . . . . ?
C44 C33 O2 C3 31.6(19) . . . . ?
C44 C33 O2 Si2 -38(2) . . . . ?
C4 C3 O2 C33 -104(2) . . . . ?
C4 C3 O2 Si2 27.2(11) . . . . ?
O3 Si2 O2 C33 99.9(13) . . . . ?
O1 Si2 O2 C33 -49.1(13) . . . . ?
N1 Si2 O2 C33 24.7(13) . . . . ?
Si1 Si2 O2 C33 -150.5(13) . . . . ?
O3 Si2 O2 C3 67.2(5) . . . . ?
O1 Si2 O2 C3 -81.7(5) . . . . ?
N1 Si2 O2 C3 -8.0(5) . . . . ?
Si1 Si2 O2 C3 176.8(5) . . . . ?
O2 Si2 O3 C5 -79.9(5) . . . . ?
O1 Si2 O3 C5 69.2(5) . . . . ?
N1 Si2 O3 C5 -4.2(5) . . . . ?
Si1 Si2 O3 C5 171.5(5) . . . . ?
Si2 O1 C1 C22 -26.2(6) . . . . ?
Si2 O1 C1 C2 24.0(7) . . . . ?
N1 C22 C1 O1 51.6(8) . . . . ?
N1 C22 C1 C2 -55.1(5) . . . . ?
N1 C2 C1 O1 -37.0(7) . . . . ?
N1 C2 C1 C22 54.8(5) . . . . ?
Si2 O3 C5 C6 13.5(8) . . . . ?
C4 N1 C6 C5 130.4(8) . . . . ?
C44 N1 C6 C5 106(2) . . . . ?
C22 N1 C6 C5 -119.9(11) . . . . ?
C2 N1 C6 C5 -96.5(7) . . . . ?
Si2 N1 C6 C5 13.6(7) . . . . ?
O3 C5 C6 N1 -17.4(9) . . . . ?
 
_diffrn_measured_fraction_theta_max    0.997
_diffrn_reflns_theta_full              26.38
_diffrn_measured_fraction_theta_full   0.997
_refine_diff_density_max    0.830
_refine_diff_density_min   -0.683
_refine_diff_density_rms    0.083

# SQUEEZE RESULTS (APPEND TO CIF)
# Note: Data are Listed for all Voids in the P1 Unit Cell
# i.e. Centre of Gravity, Solvent Accessible Volume,
# Recovered number of Electrons in the Void and
# Details about the Squeezed Material
loop_
  _platon_squeeze_void_nr
  _platon_squeeze_void_average_x
  _platon_squeeze_void_average_y
  _platon_squeeze_void_average_z
  _platon_squeeze_void_volume
  _platon_squeeze_void_count_electrons
  _platon_squeeze_void_content
   1  0.000  0.025  0.750         7         0 ' '
   2  0.500  0.475  0.250         7         0 ' '
   3  0.500  0.525  0.750         7         0 ' '
   4  0.000  0.975  0.250         7         0 ' '
_platon_squeeze_details
;
;

# start Validation Reply Form
_vrf_PLAT213_1148j
;
PROBLEM: Atom C3 has ADP max/min Ratio ..... 7.5 prolat
RESPONSE: Disorder, solved using PART instructions
;
_vrf_PLAT410_1148j
;
PROBLEM: Short Intra H...H Contact H1A .. H22B .. 1.56 Ang.
RESPONSE: Disorder, solved using PART instructions
;
# end Validation Reply Form

#===END

data_5_1183j
 
_audit_creation_method            SHELXL-97
_chemical_name_systematic
;
 ?
;
_chemical_name_common             ?
_chemical_melting_point           ?
_chemical_formula_moiety          ?
_chemical_formula_sum
 'C22 H40 Cl Hf N O3 Si4'
_chemical_formula_weight          692.85
 
loop_
 _atom_type_symbol
 _atom_type_description
 _atom_type_scat_dispersion_real
 _atom_type_scat_dispersion_imag
 _atom_type_scat_source
 'C'  'C'   0.0033   0.0016
 'International Tables Vol C Tables 4.2.6.8 and 6.1.1.4'
 'H'  'H'   0.0000   0.0000
 'International Tables Vol C Tables 4.2.6.8 and 6.1.1.4'
 'N'  'N'   0.0061   0.0033
 'International Tables Vol C Tables 4.2.6.8 and 6.1.1.4'
 'O'  'O'   0.0106   0.0060
 'International Tables Vol C Tables 4.2.6.8 and 6.1.1.4'
 'Si'  'Si'   0.0817   0.0704
 'International Tables Vol C Tables 4.2.6.8 and 6.1.1.4'
 'Hf'  'Hf'  -0.5830   6.1852
 'International Tables Vol C Tables 4.2.6.8 and 6.1.1.4'
 'Cl'  'Cl'   0.1484   0.1585
 'International Tables Vol C Tables 4.2.6.8 and 6.1.1.4'
 
_symmetry_cell_setting            monoclinic
_symmetry_space_group_name_H-M    P2(1)/c
 
loop_
 _symmetry_equiv_pos_as_xyz
 'x, y, z'
 '-x, y+1/2, -z+1/2'
 '-x, -y, -z'
 'x, -y-1/2, z-1/2'
 
_cell_length_a                    11.397(3)
_cell_length_b                    11.523(3)
_cell_length_c                    21.702(5)
_cell_angle_alpha                 90.00
_cell_angle_beta                  98.649(4)
_cell_angle_gamma                 90.00
_cell_volume                      2817.6(12)
_cell_formula_units_Z             4
_cell_measurement_temperature     100(2)
_cell_measurement_reflns_used     12344
_cell_measurement_theta_min       4.820
_cell_measurement_theta_max       52.526
 
_exptl_crystal_description        plates
_exptl_crystal_colour             yellow
_exptl_crystal_size_max           0.24
_exptl_crystal_size_mid           0.14
_exptl_crystal_size_min           0.09
_exptl_crystal_density_meas       ?
_exptl_crystal_density_diffrn     1.633
_exptl_crystal_density_method     'not measured'
_exptl_crystal_F_000              1392
_exptl_absorpt_coefficient_mu     3.991
_exptl_absorpt_correction_type    multi-scan
_exptl_absorpt_correction_T_min   0.4476
_exptl_absorpt_correction_T_max   0.7153
_exptl_absorpt_process_details    SADABS
 
_exptl_special_details
;
 ?
;
 
_diffrn_ambient_temperature       100(2)
_diffrn_radiation_wavelength      0.71073
_diffrn_radiation_type            MoK\a
_diffrn_radiation_source          'fine-focus sealed tube'
_diffrn_radiation_monochromator   graphite
_diffrn_measurement_device_type   'SMART APEX' 
_diffrn_measurement_method        '\w scans'
_diffrn_detector_area_resol_mean  ?
_diffrn_standards_number          ?
_diffrn_standards_interval_count  ?
_diffrn_standards_interval_time   ?
_diffrn_standards_decay_%         ?
_diffrn_reflns_number             21898
_diffrn_reflns_av_R_equivalents   0.0572
_diffrn_reflns_av_sigmaI/netI     0.0442
_diffrn_reflns_limit_h_min        -14
_diffrn_reflns_limit_h_max        14
_diffrn_reflns_limit_k_min        -14
_diffrn_reflns_limit_k_max        14
_diffrn_reflns_limit_l_min        -27
_diffrn_reflns_limit_l_max        27
_diffrn_reflns_theta_min          1.81
_diffrn_reflns_theta_max          26.34
_reflns_number_total              5719
_reflns_number_gt                 5372
_reflns_threshold_expression      >2sigma(I)
 
_computing_data_collection        'Bruker XSCANS'
_computing_cell_refinement        'Bruker XSCANS'
_computing_data_reduction         'Bruker SHELXTL'
_computing_structure_solution     'SHELXS-97 (Sheldrick, 1990)'
_computing_structure_refinement   'SHELXL-97 (Sheldrick, 1997)'
_computing_molecular_graphics     'Bruker SHELXTL'
_computing_publication_material   'Bruker SHELXTL'
 
_refine_special_details
;
 Refinement of F^2^ against ALL reflections.  The weighted R-factor wR and
 goodness of fit S are based on F^2^, conventional R-factors R are based
 on F, with F set to zero for negative F^2^. The threshold expression of
 F^2^ > 2sigma(F^2^) is used only for calculating R-factors(gt) etc. and is
 not relevant to the choice of reflections for refinement.  R-factors based
 on F^2^ are statistically about twice as large as those based on F, and R-
 factors based on ALL data will be even larger.
;
 
_refine_ls_structure_factor_coef  Fsqd
_refine_ls_matrix_type            full
_refine_ls_weighting_scheme       calc
_refine_ls_weighting_details
 'calc w=1/[\s^2^(Fo^2^)+(0.0376P)^2^+12.3658P] where P=(Fo^2^+2Fc^2^)/3'
_atom_sites_solution_primary      direct
_atom_sites_solution_secondary    difmap
_atom_sites_solution_hydrogens    geom
_refine_ls_hydrogen_treatment     constr
_refine_ls_extinction_method      none
_refine_ls_extinction_coef        ?
_refine_ls_number_reflns          5719
_refine_ls_number_parameters      295
_refine_ls_number_restraints      0
_refine_ls_R_factor_all           0.0472
_refine_ls_R_factor_gt            0.0433
_refine_ls_wR_factor_ref          0.0980
_refine_ls_wR_factor_gt           0.0959
_refine_ls_goodness_of_fit_ref    1.132
_refine_ls_restrained_S_all       1.132
_refine_ls_shift/su_max           0.005
_refine_ls_shift/su_mean          0.000
 
loop_
 _atom_site_label
 _atom_site_type_symbol
 _atom_site_fract_x
 _atom_site_fract_y
 _atom_site_fract_z
 _atom_site_U_iso_or_equiv
 _atom_site_adp_type
 _atom_site_occupancy
 _atom_site_symmetry_multiplicity
 _atom_site_calc_flag
 _atom_site_refinement_flags
 _atom_site_disorder_assembly
 _atom_site_disorder_group
Hf1 Hf 0.619874(18) 0.665753(18) 0.197435(9) 0.01666(9) Uani 1 1 d . . .
Cl1 Cl 0.62891(12) 0.45801(12) 0.18564(7) 0.0274(3) Uani 1 1 d . . .
N1 N 0.7814(4) 1.1217(4) 0.0727(2) 0.0213(9) Uani 1 1 d . . .
O1 O 0.7367(4) 0.9739(3) 0.15802(18) 0.0295(9) Uani 1 1 d . . .
O2 O 0.6828(4) 0.9260(3) 0.02953(19) 0.0268(9) Uani 1 1 d . . .
O3 O 0.9222(3) 0.9414(3) 0.0867(2) 0.0281(9) Uani 1 1 d . . .
Si1 Si 0.77919(12) 0.71923(12) 0.11658(6) 0.0145(3) Uani 1 1 d . . .
Si2 Si 0.98014(13) 0.67071(13) 0.15106(7) 0.0224(3) Uani 1 1 d . . .
Si3 Si 0.73889(12) 0.62968(12) 0.01735(6) 0.0165(3) Uani 1 1 d . . .
Si4 Si 0.78126(12) 0.91979(12) 0.09445(6) 0.0146(3) Uani 1 1 d . . .
C1 C 0.6197(6) 0.7004(8) 0.3097(3) 0.047(2) Uani 1 1 d . . .
H1 H 0.5459 0.6915 0.3245 0.057 Uiso 1 1 calc R . .
C2 C 0.6626(6) 0.8029(6) 0.2857(3) 0.0379(16) Uani 1 1 d . . .
H2 H 0.6239 0.8761 0.2825 0.045 Uiso 1 1 calc R . .
C3 C 0.7725(5) 0.7778(5) 0.2671(2) 0.0258(12) Uani 1 1 d . . .
H3 H 0.8208 0.8305 0.2485 0.031 Uiso 1 1 calc R . .
C4 C 0.7984(5) 0.6606(5) 0.2810(3) 0.0274(13) Uani 1 1 d . . .
H4 H 0.8674 0.6202 0.2734 0.033 Uiso 1 1 calc R . .
C5 C 0.7056(7) 0.6137(7) 0.3080(3) 0.0432(18) Uani 1 1 d . . .
H5 H 0.7013 0.5364 0.3227 0.052 Uiso 1 1 calc R . .
C6 C 0.4793(5) 0.8225(5) 0.1601(3) 0.0249(12) Uani 1 1 d . . .
H6 H 0.5034 0.8999 0.1703 0.030 Uiso 1 1 calc R . .
C7 C 0.4994(4) 0.7622(5) 0.1064(2) 0.0208(11) Uani 1 1 d . . .
H7 H 0.5379 0.7919 0.0738 0.025 Uiso 1 1 calc R . .
C8 C 0.4520(5) 0.6491(5) 0.1097(3) 0.0217(11) Uani 1 1 d . . .
H8 H 0.4537 0.5888 0.0800 0.026 Uiso 1 1 calc R . .
C9 C 0.4014(5) 0.6423(5) 0.1657(3) 0.0248(12) Uani 1 1 d . . .
H9 H 0.3631 0.5763 0.1800 0.030 Uiso 1 1 calc R . .
C10 C 0.4176(5) 0.7497(5) 0.1964(3) 0.0274(12) Uani 1 1 d . . .
H10 H 0.3917 0.7697 0.2346 0.033 Uiso 1 1 calc R . .
C11 C 1.0762(6) 0.6828(7) 0.0885(3) 0.0424(18) Uani 1 1 d . . .
H11A H 1.1598 0.6757 0.1071 0.064 Uiso 1 1 calc R . .
H11B H 1.0633 0.7584 0.0679 0.064 Uiso 1 1 calc R . .
H11C H 1.0560 0.6208 0.0579 0.064 Uiso 1 1 calc R . .
C12 C 0.9992(7) 0.5169(6) 0.1807(3) 0.0441(18) Uani 1 1 d . . .
H12A H 0.9792 0.4628 0.1459 0.066 Uiso 1 1 calc R . .
H12B H 0.9465 0.5034 0.2117 0.066 Uiso 1 1 calc R . .
H12C H 1.0817 0.5048 0.1999 0.066 Uiso 1 1 calc R . .
C13 C 1.0525(5) 0.7722(6) 0.2138(3) 0.0315(14) Uani 1 1 d . . .
H13A H 1.0157 0.7623 0.2515 0.047 Uiso 1 1 calc R . .
H13B H 1.0420 0.8526 0.1993 0.047 Uiso 1 1 calc R . .
H13C H 1.1374 0.7545 0.2234 0.047 Uiso 1 1 calc R . .
C14 C 0.7580(5) 0.4679(5) 0.0277(3) 0.0267(12) Uani 1 1 d . . .
H14A H 0.7471 0.4302 -0.0132 0.040 Uiso 1 1 calc R . .
H14B H 0.6989 0.4382 0.0522 0.040 Uiso 1 1 calc R . .
H14C H 0.8378 0.4513 0.0496 0.040 Uiso 1 1 calc R . .
C15 C 0.8408(6) 0.6823(6) -0.0376(3) 0.0310(14) Uani 1 1 d . . .
H15A H 0.9216 0.6547 -0.0233 0.047 Uiso 1 1 calc R . .
H15B H 0.8403 0.7673 -0.0386 0.047 Uiso 1 1 calc R . .
H15C H 0.8133 0.6522 -0.0796 0.047 Uiso 1 1 calc R . .
C16 C 0.5865(5) 0.6575(5) -0.0278(3) 0.0240(12) Uani 1 1 d . . .
H16A H 0.5731 0.7413 -0.0319 0.036 Uiso 1 1 calc R . .
H16B H 0.5263 0.6230 -0.0056 0.036 Uiso 1 1 calc R . .
H16C H 0.5811 0.6226 -0.0693 0.036 Uiso 1 1 calc R . .
C17 C 0.7034(10) 1.0887(6) 0.1660(4) 0.064(3) Uani 1 1 d . . .
H17A H 0.7321 1.1112 0.2097 0.077 Uiso 1 1 calc R . .
H17B H 0.6156 1.0922 0.1600 0.077 Uiso 1 1 calc R . .
C18 C 0.7439(13) 1.1721(6) 0.1267(5) 0.087(4) Uani 1 1 d . . .
H18A H 0.8111 1.2153 0.1504 0.105 Uiso 1 1 calc R . .
H18B H 0.6794 1.2283 0.1134 0.105 Uiso 1 1 calc R . .
C19 C 0.6655(8) 1.0204(6) -0.0107(3) 0.053(2) Uani 1 1 d . . .
H19A H 0.5805 1.0228 -0.0290 0.064 Uiso 1 1 calc R . .
H19B H 0.7116 1.0071 -0.0452 0.064 Uiso 1 1 calc R . .
C20 C 0.6975(9) 1.1316(6) 0.0159(4) 0.060(3) Uani 1 1 d . . .
H20A H 0.6252 1.1719 0.0249 0.071 Uiso 1 1 calc R . .
H20B H 0.7329 1.1791 -0.0146 0.071 Uiso 1 1 calc R . .
C21 C 0.9778(6) 1.0486(6) 0.0850(5) 0.051(2) Uani 1 1 d . . .
H21A H 1.0374 1.0428 0.0563 0.061 Uiso 1 1 calc R . .
H21B H 1.0211 1.0654 0.1271 0.061 Uiso 1 1 calc R . .
C22 C 0.9008(6) 1.1448(6) 0.0657(6) 0.081(4) Uani 1 1 d . . .
H22A H 0.9289 1.2139 0.0908 0.098 Uiso 1 1 calc R . .
H22B H 0.9048 1.1628 0.0215 0.098 Uiso 1 1 calc R . .
 
loop_
 _atom_site_aniso_label
 _atom_site_aniso_U_11
 _atom_site_aniso_U_22
 _atom_site_aniso_U_33
 _atom_site_aniso_U_23
 _atom_site_aniso_U_13
 _atom_site_aniso_U_12
Hf1 0.01771(13) 0.01844(13) 0.01370(12) -0.00040(8) 0.00195(8) -0.00231(8)
Cl1 0.0327(8) 0.0184(6) 0.0310(7) 0.0048(5) 0.0046(6) -0.0006(5)
N1 0.025(2) 0.019(2) 0.021(2) 0.0028(19) 0.0052(19) 0.0006(18)
O1 0.052(3) 0.0161(19) 0.025(2) -0.0022(16) 0.0188(19) 0.0012(18)
O2 0.032(2) 0.0154(19) 0.028(2) 0.0047(16) -0.0114(17) -0.0014(15)
O3 0.0142(19) 0.021(2) 0.050(3) 0.0126(18) 0.0080(17) 0.0025(15)
Si1 0.0152(7) 0.0149(7) 0.0129(6) 0.0016(5) 0.0008(5) 0.0024(5)
Si2 0.0206(7) 0.0275(8) 0.0186(7) 0.0025(6) 0.0011(6) 0.0098(6)
Si3 0.0192(7) 0.0162(7) 0.0139(6) -0.0021(5) 0.0023(5) -0.0008(5)
Si4 0.0145(7) 0.0154(7) 0.0136(6) -0.0009(5) 0.0008(5) 0.0006(5)
C1 0.031(4) 0.100(6) 0.011(3) -0.017(3) 0.006(2) -0.019(4)
C2 0.036(4) 0.048(4) 0.028(3) -0.027(3) -0.003(3) 0.004(3)
C3 0.026(3) 0.033(3) 0.016(3) -0.004(2) -0.001(2) -0.011(2)
C4 0.026(3) 0.040(3) 0.013(2) 0.002(2) -0.006(2) 0.002(2)
C5 0.053(4) 0.059(5) 0.014(3) 0.012(3) -0.008(3) -0.028(4)
C6 0.022(3) 0.019(3) 0.032(3) -0.001(2) -0.001(2) 0.006(2)
C7 0.013(2) 0.027(3) 0.022(3) 0.006(2) 0.001(2) 0.004(2)
C8 0.021(3) 0.024(3) 0.017(3) -0.002(2) -0.005(2) -0.001(2)
C9 0.020(3) 0.028(3) 0.026(3) 0.002(2) 0.001(2) -0.005(2)
C10 0.021(3) 0.032(3) 0.030(3) 0.001(3) 0.007(2) 0.005(2)
C11 0.025(3) 0.074(5) 0.029(3) 0.000(3) 0.007(3) 0.016(3)
C12 0.055(4) 0.032(4) 0.040(4) 0.007(3) -0.006(3) 0.024(3)
C13 0.018(3) 0.046(4) 0.029(3) -0.002(3) -0.002(2) 0.002(2)
C14 0.030(3) 0.019(3) 0.029(3) -0.008(2) -0.002(2) 0.002(2)
C15 0.031(3) 0.042(4) 0.021(3) 0.001(3) 0.009(2) -0.010(3)
C16 0.026(3) 0.023(3) 0.022(3) -0.006(2) 0.000(2) 0.001(2)
C17 0.126(8) 0.018(3) 0.067(5) 0.001(3) 0.074(6) 0.016(4)
C18 0.202(13) 0.016(3) 0.063(6) 0.003(3) 0.081(8) 0.016(5)
C19 0.085(6) 0.023(3) 0.038(4) 0.014(3) -0.037(4) -0.008(3)
C20 0.095(7) 0.021(3) 0.048(5) 0.014(3) -0.037(4) -0.010(4)
C21 0.021(3) 0.026(3) 0.103(7) 0.003(4) -0.001(4) -0.007(3)
C22 0.023(4) 0.028(4) 0.193(12) 0.042(6) 0.017(5) -0.008(3)
 
_geom_special_details
;
 All esds (except the esd in the dihedral angle between two l.s. planes)
 are estimated using the full covariance matrix.  The cell esds are taken
 into account individually in the estimation of esds in distances, angles
 and torsion angles; correlations between esds in cell parameters are only
 used when they are defined by crystal symmetry.  An approximate (isotropic)
 treatment of cell esds is used for estimating esds involving l.s. planes.
;
 
loop_
 _geom_bond_atom_site_label_1
 _geom_bond_atom_site_label_2
 _geom_bond_distance
 _geom_bond_site_symmetry_2
 _geom_bond_publ_flag
Hf1 Cl1 2.4114(15) . ?
Hf1 C6 2.469(5) . ?
Hf1 C1 2.469(6) . ?
Hf1 C2 2.474(6) . ?
Hf1 C3 2.488(5) . ?
Hf1 C7 2.491(5) . ?
Hf1 C8 2.495(5) . ?
Hf1 C9 2.496(5) . ?
Hf1 C10 2.497(5) . ?
Hf1 C4 2.515(5) . ?
Hf1 C5 2.523(6) . ?
Hf1 Si1 2.7774(14) . ?
N1 C22 1.417(8) . ?
N1 C18 1.430(9) . ?
N1 C20 1.448(8) . ?
O1 C17 1.394(7) . ?
O1 Si4 1.662(4) . ?
O2 C19 1.390(7) . ?
O2 Si4 1.665(4) . ?
O3 C21 1.392(7) . ?
O3 Si4 1.659(4) . ?
Si1 Si4 2.361(2) . ?
Si1 Si2 2.367(2) . ?
Si1 Si3 2.3698(19) . ?
Si2 C11 1.873(7) . ?
Si2 C12 1.886(7) . ?
Si2 C13 1.889(6) . ?
Si3 C15 1.886(6) . ?
Si3 C14 1.886(6) . ?
Si3 C16 1.888(6) . ?
C1 C5 1.403(12) . ?
C1 C2 1.408(11) . ?
C2 C3 1.401(9) . ?
C3 C4 1.405(8) . ?
C4 C5 1.392(9) . ?
C6 C7 1.405(8) . ?
C6 C10 1.408(8) . ?
C7 C8 1.417(8) . ?
C8 C9 1.425(8) . ?
C9 C10 1.404(8) . ?
C17 C18 1.407(10) . ?
C19 C20 1.429(9) . ?
C21 C22 1.437(10) . ?
 
loop_
 _geom_angle_atom_site_label_1
 _geom_angle_atom_site_label_2
 _geom_angle_atom_site_label_3
 _geom_angle
 _geom_angle_site_symmetry_1
 _geom_angle_site_symmetry_3
 _geom_angle_publ_flag
Cl1 Hf1 C6 136.67(14) . . ?
Cl1 Hf1 C1 105.8(2) . . ?
C6 Hf1 C1 96.3(3) . . ?
Cl1 Hf1 C2 135.21(18) . . ?
C6 Hf1 C2 80.2(2) . . ?
C1 Hf1 C2 33.1(3) . . ?
Cl1 Hf1 C3 122.86(15) . . ?
C6 Hf1 C3 100.36(19) . . ?
C1 Hf1 C3 54.6(2) . . ?
C2 Hf1 C3 32.8(2) . . ?
Cl1 Hf1 C7 112.70(13) . . ?
C6 Hf1 C7 32.91(18) . . ?
C1 Hf1 C7 128.9(2) . . ?
C2 Hf1 C7 110.5(2) . . ?
C3 Hf1 C7 120.14(19) . . ?
Cl1 Hf1 C8 83.26(13) . . ?
C6 Hf1 C8 54.60(18) . . ?
C1 Hf1 C8 130.6(2) . . ?
C2 Hf1 C8 132.8(2) . . ?
C3 Hf1 C8 152.83(19) . . ?
C7 Hf1 C8 33.02(18) . . ?
Cl1 Hf1 C9 85.41(14) . . ?
C6 Hf1 C9 54.38(19) . . ?
C1 Hf1 C9 98.1(2) . . ?
C2 Hf1 C9 110.8(2) . . ?
C3 Hf1 C9 143.22(19) . . ?
C7 Hf1 C9 54.69(18) . . ?
C8 Hf1 C9 33.16(18) . . ?
Cl1 Hf1 C10 115.96(15) . . ?
C6 Hf1 C10 32.95(19) . . ?
C1 Hf1 C10 79.0(2) . . ?
C2 Hf1 C10 80.4(2) . . ?
C3 Hf1 C10 111.4(2) . . ?
C7 Hf1 C10 54.70(18) . . ?
C8 Hf1 C10 54.69(19) . . ?
C9 Hf1 C10 32.66(19) . . ?
Cl1 Hf1 C4 90.59(14) . . ?
C6 Hf1 C4 131.97(19) . . ?
C1 Hf1 C4 54.0(2) . . ?
C2 Hf1 C4 54.0(2) . . ?
C3 Hf1 C4 32.63(19) . . ?
C7 Hf1 C4 150.72(19) . . ?
C8 Hf1 C4 173.18(19) . . ?
C9 Hf1 C4 149.47(19) . . ?
C10 Hf1 C4 131.4(2) . . ?
Cl1 Hf1 C5 81.27(19) . . ?
C6 Hf1 C5 128.7(2) . . ?
C1 Hf1 C5 32.6(3) . . ?
C2 Hf1 C5 54.0(3) . . ?
C3 Hf1 C5 53.8(2) . . ?
C7 Hf1 C5 161.5(2) . . ?
C8 Hf1 C5 148.2(2) . . ?
C9 Hf1 C5 117.6(2) . . ?
C10 Hf1 C5 109.0(2) . . ?
C4 Hf1 C5 32.1(2) . . ?
Cl1 Hf1 Si1 96.36(4) . . ?
C6 Hf1 Si1 94.82(14) . . ?
C1 Hf1 Si1 133.24(16) . . ?
C2 Hf1 Si1 106.01(17) . . ?
C3 Hf1 Si1 78.77(13) . . ?
C7 Hf1 Si1 74.61(12) . . ?
C8 Hf1 Si1 91.95(14) . . ?
C9 Hf1 Si1 124.73(14) . . ?
C10 Hf1 Si1 126.77(14) . . ?
C4 Hf1 Si1 85.78(14) . . ?
C5 Hf1 Si1 117.19(17) . . ?
C22 N1 C18 114.9(8) . . ?
C22 N1 C20 114.6(7) . . ?
C18 N1 C20 115.2(8) . . ?
C17 O1 Si4 125.6(4) . . ?
C19 O2 Si4 125.4(4) . . ?
C21 O3 Si4 126.0(4) . . ?
Si4 Si1 Si2 104.88(7) . . ?
Si4 Si1 Si3 104.35(7) . . ?
Si2 Si1 Si3 103.33(7) . . ?
Si4 Si1 Hf1 111.91(6) . . ?
Si2 Si1 Hf1 116.18(6) . . ?
Si3 Si1 Hf1 114.94(6) . . ?
C11 Si2 C12 105.5(3) . . ?
C11 Si2 C13 103.7(3) . . ?
C12 Si2 C13 108.7(3) . . ?
C11 Si2 Si1 113.4(2) . . ?
C12 Si2 Si1 112.7(2) . . ?
C13 Si2 Si1 112.2(2) . . ?
C15 Si3 C14 108.8(3) . . ?
C15 Si3 C16 102.9(3) . . ?
C14 Si3 C16 108.1(3) . . ?
C15 Si3 Si1 112.4(2) . . ?
C14 Si3 Si1 108.57(19) . . ?
C16 Si3 Si1 115.77(18) . . ?
O3 Si4 O1 116.7(2) . . ?
O3 Si4 O2 116.5(2) . . ?
O1 Si4 O2 115.8(2) . . ?
O3 Si4 Si1 101.93(15) . . ?
O1 Si4 Si1 100.65(15) . . ?
O2 Si4 Si1 100.85(14) . . ?
C5 C1 C2 107.7(6) . . ?
C5 C1 Hf1 75.8(4) . . ?
C2 C1 Hf1 73.6(3) . . ?
C3 C2 C1 108.0(6) . . ?
C3 C2 Hf1 74.1(3) . . ?
C1 C2 Hf1 73.3(3) . . ?
C2 C3 C4 107.7(6) . . ?
C2 C3 Hf1 73.1(3) . . ?
C4 C3 Hf1 74.7(3) . . ?
C5 C4 C3 108.4(6) . . ?
C5 C4 Hf1 74.3(3) . . ?
C3 C4 Hf1 72.6(3) . . ?
C4 C5 C1 108.2(6) . . ?
C4 C5 Hf1 73.6(3) . . ?
C1 C5 Hf1 71.6(4) . . ?
C7 C6 C10 109.1(5) . . ?
C7 C6 Hf1 74.4(3) . . ?
C10 C6 Hf1 74.6(3) . . ?
C6 C7 C8 107.6(5) . . ?
C6 C7 Hf1 72.7(3) . . ?
C8 C7 Hf1 73.6(3) . . ?
C7 C8 C9 107.5(5) . . ?
C7 C8 Hf1 73.3(3) . . ?
C9 C8 Hf1 73.5(3) . . ?
C10 C9 C8 108.3(5) . . ?
C10 C9 Hf1 73.7(3) . . ?
C8 C9 Hf1 73.4(3) . . ?
C9 C10 C6 107.5(5) . . ?
C9 C10 Hf1 73.7(3) . . ?
C6 C10 Hf1 72.4(3) . . ?
O1 C17 C18 116.9(6) . . ?
C17 C18 N1 112.6(6) . . ?
O2 C19 C20 116.4(6) . . ?
C19 C20 N1 111.6(5) . . ?
O3 C21 C22 115.6(5) . . ?
N1 C22 C21 112.2(6) . . ?
 
loop_
 _geom_torsion_atom_site_label_1
 _geom_torsion_atom_site_label_2
 _geom_torsion_atom_site_label_3
 _geom_torsion_atom_site_label_4
 _geom_torsion
 _geom_torsion_site_symmetry_1
 _geom_torsion_site_symmetry_2
 _geom_torsion_site_symmetry_3
 _geom_torsion_site_symmetry_4
 _geom_torsion_publ_flag
Cl1 Hf1 Si1 Si4 169.56(6) . . . . ?
C6 Hf1 Si1 Si4 31.50(15) . . . . ?
C1 Hf1 Si1 Si4 -71.8(3) . . . . ?
C2 Hf1 Si1 Si4 -49.64(19) . . . . ?
C3 Hf1 Si1 Si4 -68.12(16) . . . . ?
C7 Hf1 Si1 Si4 57.72(14) . . . . ?
C8 Hf1 Si1 Si4 86.13(14) . . . . ?
C9 Hf1 Si1 Si4 80.75(17) . . . . ?
C10 Hf1 Si1 Si4 40.28(19) . . . . ?
C4 Hf1 Si1 Si4 -100.31(15) . . . . ?
C5 Hf1 Si1 Si4 -107.0(2) . . . . ?
Cl1 Hf1 Si1 Si2 -70.03(8) . . . . ?
C6 Hf1 Si1 Si2 151.91(15) . . . . ?
C1 Hf1 Si1 Si2 48.6(3) . . . . ?
C2 Hf1 Si1 Si2 70.77(19) . . . . ?
C3 Hf1 Si1 Si2 52.28(16) . . . . ?
C7 Hf1 Si1 Si2 178.13(15) . . . . ?
C8 Hf1 Si1 Si2 -153.46(14) . . . . ?
C9 Hf1 Si1 Si2 -158.84(17) . . . . ?
C10 Hf1 Si1 Si2 160.69(18) . . . . ?
C4 Hf1 Si1 Si2 20.09(15) . . . . ?
C5 Hf1 Si1 Si2 13.4(2) . . . . ?
Cl1 Hf1 Si1 Si3 50.77(7) . . . . ?
C6 Hf1 Si1 Si3 -87.29(15) . . . . ?
C1 Hf1 Si1 Si3 169.4(3) . . . . ?
C2 Hf1 Si1 Si3 -168.43(18) . . . . ?
C3 Hf1 Si1 Si3 173.08(16) . . . . ?
C7 Hf1 Si1 Si3 -61.07(15) . . . . ?
C8 Hf1 Si1 Si3 -32.66(14) . . . . ?
C9 Hf1 Si1 Si3 -38.04(18) . . . . ?
C10 Hf1 Si1 Si3 -78.52(19) . . . . ?
C4 Hf1 Si1 Si3 140.89(15) . . . . ?
C5 Hf1 Si1 Si3 134.2(2) . . . . ?
Si4 Si1 Si2 C11 -67.0(3) . . . . ?
Si3 Si1 Si2 C11 42.1(3) . . . . ?
Hf1 Si1 Si2 C11 168.9(3) . . . . ?
Si4 Si1 Si2 C12 173.3(3) . . . . ?
Si3 Si1 Si2 C12 -77.7(3) . . . . ?
Hf1 Si1 Si2 C12 49.1(3) . . . . ?
Si4 Si1 Si2 C13 50.1(2) . . . . ?
Si3 Si1 Si2 C13 159.2(2) . . . . ?
Hf1 Si1 Si2 C13 -74.0(2) . . . . ?
Si4 Si1 Si3 C15 51.0(2) . . . . ?
Si2 Si1 Si3 C15 -58.5(2) . . . . ?
Hf1 Si1 Si3 C15 173.9(2) . . . . ?
Si4 Si1 Si3 C14 171.4(2) . . . . ?
Si2 Si1 Si3 C14 62.0(2) . . . . ?
Hf1 Si1 Si3 C14 -65.6(2) . . . . ?
Si4 Si1 Si3 C16 -66.9(2) . . . . ?
Si2 Si1 Si3 C16 -176.3(2) . . . . ?
Hf1 Si1 Si3 C16 56.1(2) . . . . ?
C21 O3 Si4 O1 -58.4(7) . . . . ?
C21 O3 Si4 O2 84.3(6) . . . . ?
C21 O3 Si4 Si1 -167.0(6) . . . . ?
C17 O1 Si4 O3 81.6(7) . . . . ?
C17 O1 Si4 O2 -61.4(7) . . . . ?
C17 O1 Si4 Si1 -169.1(7) . . . . ?
C19 O2 Si4 O3 -57.5(6) . . . . ?
C19 O2 Si4 O1 85.6(6) . . . . ?
C19 O2 Si4 Si1 -166.9(6) . . . . ?
Si2 Si1 Si4 O3 19.54(18) . . . . ?
Si3 Si1 Si4 O3 -88.78(18) . . . . ?
Hf1 Si1 Si4 O3 146.33(17) . . . . ?
Si2 Si1 Si4 O1 -100.98(18) . . . . ?
Si3 Si1 Si4 O1 150.71(17) . . . . ?
Hf1 Si1 Si4 O1 25.82(18) . . . . ?
Si2 Si1 Si4 O2 139.90(17) . . . . ?
Si3 Si1 Si4 O2 31.59(18) . . . . ?
Hf1 Si1 Si4 O2 -93.30(17) . . . . ?
Cl1 Hf1 C1 C5 42.8(4) . . . . ?
C6 Hf1 C1 C5 -174.9(4) . . . . ?
C2 Hf1 C1 C5 -113.7(6) . . . . ?
C3 Hf1 C1 C5 -76.6(4) . . . . ?
C7 Hf1 C1 C5 -179.1(4) . . . . ?
C8 Hf1 C1 C5 137.5(4) . . . . ?
C9 Hf1 C1 C5 130.3(4) . . . . ?
C10 Hf1 C1 C5 157.0(4) . . . . ?
C4 Hf1 C1 C5 -36.1(4) . . . . ?
Si1 Hf1 C1 C5 -72.2(5) . . . . ?
Cl1 Hf1 C1 C2 156.5(4) . . . . ?
C6 Hf1 C1 C2 -61.2(4) . . . . ?
C3 Hf1 C1 C2 37.1(4) . . . . ?
C7 Hf1 C1 C2 -65.4(5) . . . . ?
C8 Hf1 C1 C2 -108.8(4) . . . . ?
C9 Hf1 C1 C2 -116.0(4) . . . . ?
C10 Hf1 C1 C2 -89.3(4) . . . . ?
C4 Hf1 C1 C2 77.6(4) . . . . ?
C5 Hf1 C1 C2 113.7(6) . . . . ?
Si1 Hf1 C1 C2 41.5(5) . . . . ?
C5 C1 C2 C3 2.2(7) . . . . ?
Hf1 C1 C2 C3 -66.6(4) . . . . ?
C5 C1 C2 Hf1 68.7(4) . . . . ?
Cl1 Hf1 C2 C3 81.9(4) . . . . ?
C6 Hf1 C2 C3 -127.3(4) . . . . ?
C1 Hf1 C2 C3 114.8(6) . . . . ?
C7 Hf1 C2 C3 -114.2(4) . . . . ?
C8 Hf1 C2 C3 -143.3(3) . . . . ?
C9 Hf1 C2 C3 -173.0(4) . . . . ?
C10 Hf1 C2 C3 -160.7(4) . . . . ?
C4 Hf1 C2 C3 37.3(4) . . . . ?
C5 Hf1 C2 C3 77.3(4) . . . . ?
Si1 Hf1 C2 C3 -35.0(4) . . . . ?
Cl1 Hf1 C2 C1 -32.9(5) . . . . ?
C6 Hf1 C2 C1 117.9(4) . . . . ?
C3 Hf1 C2 C1 -114.8(6) . . . . ?
C7 Hf1 C2 C1 131.0(4) . . . . ?
C8 Hf1 C2 C1 101.9(5) . . . . ?
C9 Hf1 C2 C1 72.2(5) . . . . ?
C10 Hf1 C2 C1 84.5(4) . . . . ?
C4 Hf1 C2 C1 -77.5(5) . . . . ?
C5 Hf1 C2 C1 -37.6(4) . . . . ?
Si1 Hf1 C2 C1 -149.9(4) . . . . ?
C1 C2 C3 C4 -1.3(6) . . . . ?
Hf1 C2 C3 C4 -67.3(4) . . . . ?
C1 C2 C3 Hf1 66.0(4) . . . . ?
Cl1 Hf1 C3 C2 -123.9(4) . . . . ?
C6 Hf1 C3 C2 52.9(4) . . . . ?
C1 Hf1 C3 C2 -37.5(4) . . . . ?
C7 Hf1 C3 C2 81.1(4) . . . . ?
C8 Hf1 C3 C2 73.9(6) . . . . ?
C9 Hf1 C3 C2 11.0(6) . . . . ?
C10 Hf1 C3 C2 20.5(4) . . . . ?
C4 Hf1 C3 C2 -114.4(5) . . . . ?
C5 Hf1 C3 C2 -78.0(5) . . . . ?
Si1 Hf1 C3 C2 145.8(4) . . . . ?
Cl1 Hf1 C3 C4 -9.5(4) . . . . ?
C6 Hf1 C3 C4 167.3(4) . . . . ?
C1 Hf1 C3 C4 76.9(4) . . . . ?
C2 Hf1 C3 C4 114.4(5) . . . . ?
C7 Hf1 C3 C4 -164.5(3) . . . . ?
C8 Hf1 C3 C4 -171.7(4) . . . . ?
C9 Hf1 C3 C4 125.4(4) . . . . ?
C10 Hf1 C3 C4 134.9(3) . . . . ?
C5 Hf1 C3 C4 36.4(4) . . . . ?
Si1 Hf1 C3 C4 -99.8(3) . . . . ?
C2 C3 C4 C5 -0.1(6) . . . . ?
Hf1 C3 C4 C5 -66.3(4) . . . . ?
C2 C3 C4 Hf1 66.1(4) . . . . ?
Cl1 Hf1 C4 C5 -72.4(4) . . . . ?
C6 Hf1 C4 C5 98.6(5) . . . . ?
C1 Hf1 C4 C5 36.7(5) . . . . ?
C2 Hf1 C4 C5 78.0(5) . . . . ?
C3 Hf1 C4 C5 115.5(6) . . . . ?
C7 Hf1 C4 C5 143.8(5) . . . . ?
C8 Hf1 C4 C5 -98.0(16) . . . . ?
C9 Hf1 C4 C5 9.5(7) . . . . ?
C10 Hf1 C4 C5 53.9(5) . . . . ?
Si1 Hf1 C4 C5 -168.7(4) . . . . ?
Cl1 Hf1 C4 C3 172.1(3) . . . . ?
C6 Hf1 C4 C3 -17.0(5) . . . . ?
C1 Hf1 C4 C3 -78.8(4) . . . . ?
C2 Hf1 C4 C3 -37.6(4) . . . . ?
C7 Hf1 C4 C3 28.2(6) . . . . ?
C8 Hf1 C4 C3 146.5(14) . . . . ?
C9 Hf1 C4 C3 -106.0(4) . . . . ?
C10 Hf1 C4 C3 -61.6(4) . . . . ?
C5 Hf1 C4 C3 -115.5(6) . . . . ?
Si1 Hf1 C4 C3 75.7(3) . . . . ?
C3 C4 C5 C1 1.4(7) . . . . ?
Hf1 C4 C5 C1 -63.7(4) . . . . ?
C3 C4 C5 Hf1 65.2(4) . . . . ?
C2 C1 C5 C4 -2.2(7) . . . . ?
Hf1 C1 C5 C4 65.0(4) . . . . ?
C2 C1 C5 Hf1 -67.3(4) . . . . ?
Cl1 Hf1 C5 C4 105.3(4) . . . . ?
C6 Hf1 C5 C4 -109.6(4) . . . . ?
C1 Hf1 C5 C4 -116.1(6) . . . . ?
C2 Hf1 C5 C4 -78.0(4) . . . . ?
C3 Hf1 C5 C4 -37.1(4) . . . . ?
C7 Hf1 C5 C4 -114.0(6) . . . . ?
C8 Hf1 C5 C4 167.1(4) . . . . ?
C9 Hf1 C5 C4 -174.6(4) . . . . ?
C10 Hf1 C5 C4 -140.1(4) . . . . ?
Si1 Hf1 C5 C4 12.6(5) . . . . ?
Cl1 Hf1 C5 C1 -138.5(4) . . . . ?
C6 Hf1 C5 C1 6.6(5) . . . . ?
C2 Hf1 C5 C1 38.2(4) . . . . ?
C3 Hf1 C5 C1 79.1(5) . . . . ?
C7 Hf1 C5 C1 2.1(9) . . . . ?
C8 Hf1 C5 C1 -76.8(6) . . . . ?
C9 Hf1 C5 C1 -58.4(5) . . . . ?
C10 Hf1 C5 C1 -24.0(5) . . . . ?
C4 Hf1 C5 C1 116.1(6) . . . . ?
Si1 Hf1 C5 C1 128.8(4) . . . . ?
Cl1 Hf1 C6 C7 -52.9(4) . . . . ?
C1 Hf1 C6 C7 -173.9(3) . . . . ?
C2 Hf1 C6 C7 157.1(4) . . . . ?
C3 Hf1 C6 C7 131.1(3) . . . . ?
C8 Hf1 C6 C7 -37.3(3) . . . . ?
C9 Hf1 C6 C7 -78.4(4) . . . . ?
C10 Hf1 C6 C7 -115.4(5) . . . . ?
C4 Hf1 C6 C7 140.3(3) . . . . ?
C5 Hf1 C6 C7 -177.4(3) . . . . ?
Si1 Hf1 C6 C7 51.6(3) . . . . ?
Cl1 Hf1 C6 C10 62.4(4) . . . . ?
C1 Hf1 C6 C10 -58.5(4) . . . . ?
C2 Hf1 C6 C10 -87.5(4) . . . . ?
C3 Hf1 C6 C10 -113.5(4) . . . . ?
C7 Hf1 C6 C10 115.4(5) . . . . ?
C8 Hf1 C6 C10 78.0(4) . . . . ?
C9 Hf1 C6 C10 37.0(3) . . . . ?
C4 Hf1 C6 C10 -104.3(4) . . . . ?
C5 Hf1 C6 C10 -62.0(4) . . . . ?
Si1 Hf1 C6 C10 167.0(3) . . . . ?
C10 C6 C7 C8 -1.3(6) . . . . ?
Hf1 C6 C7 C8 65.9(4) . . . . ?
C10 C6 C7 Hf1 -67.2(4) . . . . ?
Cl1 Hf1 C7 C6 143.6(3) . . . . ?
C1 Hf1 C7 C6 7.9(4) . . . . ?
C2 Hf1 C7 C6 -24.2(4) . . . . ?
C3 Hf1 C7 C6 -59.0(4) . . . . ?
C8 Hf1 C7 C6 114.9(5) . . . . ?
C9 Hf1 C7 C6 77.3(4) . . . . ?
C10 Hf1 C7 C6 37.0(3) . . . . ?
C4 Hf1 C7 C6 -76.2(5) . . . . ?
C5 Hf1 C7 C6 6.4(8) . . . . ?
Si1 Hf1 C7 C6 -125.9(3) . . . . ?
Cl1 Hf1 C7 C8 28.7(3) . . . . ?
C6 Hf1 C7 C8 -114.9(5) . . . . ?
C1 Hf1 C7 C8 -107.0(4) . . . . ?
C2 Hf1 C7 C8 -139.1(3) . . . . ?
C3 Hf1 C7 C8 -173.9(3) . . . . ?
C9 Hf1 C7 C8 -37.6(3) . . . . ?
C10 Hf1 C7 C8 -77.9(4) . . . . ?
C4 Hf1 C7 C8 168.9(4) . . . . ?
C5 Hf1 C7 C8 -108.5(6) . . . . ?
Si1 Hf1 C7 C8 119.2(3) . . . . ?
C6 C7 C8 C9 0.8(6) . . . . ?
Hf1 C7 C8 C9 66.1(4) . . . . ?
C6 C7 C8 Hf1 -65.3(4) . . . . ?
Cl1 Hf1 C8 C7 -153.5(3) . . . . ?
C6 Hf1 C8 C7 37.2(3) . . . . ?
C1 Hf1 C8 C7 101.5(4) . . . . ?
C2 Hf1 C8 C7 56.7(4) . . . . ?
C3 Hf1 C8 C7 11.6(6) . . . . ?
C9 Hf1 C8 C7 114.6(5) . . . . ?
C10 Hf1 C8 C7 77.9(3) . . . . ?
C4 Hf1 C8 C7 -127.7(15) . . . . ?
C5 Hf1 C8 C7 145.2(5) . . . . ?
Si1 Hf1 C8 C7 -57.3(3) . . . . ?
Cl1 Hf1 C8 C9 91.9(3) . . . . ?
C6 Hf1 C8 C9 -77.4(4) . . . . ?
C1 Hf1 C8 C9 -13.1(5) . . . . ?
C2 Hf1 C8 C9 -57.9(4) . . . . ?
C3 Hf1 C8 C9 -103.0(5) . . . . ?
C7 Hf1 C8 C9 -114.6(5) . . . . ?
C10 Hf1 C8 C9 -36.7(3) . . . . ?
C4 Hf1 C8 C9 117.7(15) . . . . ?
C5 Hf1 C8 C9 30.7(6) . . . . ?
Si1 Hf1 C8 C9 -171.9(3) . . . . ?
C7 C8 C9 C10 0.0(6) . . . . ?
Hf1 C8 C9 C10 65.9(4) . . . . ?
C7 C8 C9 Hf1 -66.0(4) . . . . ?
Cl1 Hf1 C9 C10 159.9(3) . . . . ?
C6 Hf1 C9 C10 -37.3(3) . . . . ?
C1 Hf1 C9 C10 54.6(4) . . . . ?
C2 Hf1 C9 C10 22.9(4) . . . . ?
C3 Hf1 C9 C10 16.6(5) . . . . ?
C7 Hf1 C9 C10 -78.0(4) . . . . ?
C8 Hf1 C9 C10 -115.4(5) . . . . ?
C4 Hf1 C9 C10 76.5(5) . . . . ?
C5 Hf1 C9 C10 82.2(4) . . . . ?
Si1 Hf1 C9 C10 -105.6(3) . . . . ?
Cl1 Hf1 C9 C8 -84.7(3) . . . . ?
C6 Hf1 C9 C8 78.1(4) . . . . ?
C1 Hf1 C9 C8 170.0(4) . . . . ?
C2 Hf1 C9 C8 138.3(3) . . . . ?
C3 Hf1 C9 C8 132.0(4) . . . . ?
C7 Hf1 C9 C8 37.4(3) . . . . ?
C10 Hf1 C9 C8 115.4(5) . . . . ?
C4 Hf1 C9 C8 -168.0(4) . . . . ?
C5 Hf1 C9 C8 -162.3(3) . . . . ?
Si1 Hf1 C9 C8 9.9(4) . . . . ?
C8 C9 C10 C6 -0.7(6) . . . . ?
Hf1 C9 C10 C6 65.0(4) . . . . ?
C8 C9 C10 Hf1 -65.7(4) . . . . ?
C7 C6 C10 C9 1.3(6) . . . . ?
Hf1 C6 C10 C9 -65.8(4) . . . . ?
C7 C6 C10 Hf1 67.1(4) . . . . ?
Cl1 Hf1 C10 C9 -22.4(4) . . . . ?
C6 Hf1 C10 C9 115.0(5) . . . . ?
C1 Hf1 C10 C9 -124.7(4) . . . . ?
C2 Hf1 C10 C9 -158.3(4) . . . . ?
C3 Hf1 C10 C9 -169.4(3) . . . . ?
C7 Hf1 C10 C9 78.0(4) . . . . ?
C8 Hf1 C10 C9 37.3(3) . . . . ?
C4 Hf1 C10 C9 -138.8(3) . . . . ?
C5 Hf1 C10 C9 -111.8(4) . . . . ?
Si1 Hf1 C10 C9 98.8(3) . . . . ?
Cl1 Hf1 C10 C6 -137.4(3) . . . . ?
C1 Hf1 C10 C6 120.3(4) . . . . ?
C2 Hf1 C10 C6 86.7(4) . . . . ?
C3 Hf1 C10 C6 75.6(4) . . . . ?
C7 Hf1 C10 C6 -37.0(3) . . . . ?
C8 Hf1 C10 C6 -77.7(4) . . . . ?
C9 Hf1 C10 C6 -115.0(5) . . . . ?
C4 Hf1 C10 C6 106.2(4) . . . . ?
C5 Hf1 C10 C6 133.2(4) . . . . ?
Si1 Hf1 C10 C6 -16.2(4) . . . . ?
Si4 O1 C17 C18 -20.6(14) . . . . ?
O1 C17 C18 N1 18.3(16) . . . . ?
C22 N1 C18 C17 -121.6(11) . . . . ?
C20 N1 C18 C17 101.8(11) . . . . ?
Si4 O2 C19 C20 -25.6(11) . . . . ?
O2 C19 C20 N1 21.6(12) . . . . ?
C22 N1 C20 C19 101.1(9) . . . . ?
C18 N1 C20 C19 -122.2(9) . . . . ?
Si4 O3 C21 C22 -23.9(12) . . . . ?
C18 N1 C22 C21 101.0(10) . . . . ?
C20 N1 C22 C21 -122.1(9) . . . . ?
O3 C21 C22 N1 20.5(14) . . . . ?
 
_diffrn_measured_fraction_theta_max    0.995
_diffrn_reflns_theta_full              26.34
_diffrn_measured_fraction_theta_full   0.995
_refine_diff_density_max    2.815
_refine_diff_density_min   -1.715
_refine_diff_density_rms    0.166

#===END

data_6_1158j
 
_audit_creation_method            SHELXL-97
_chemical_name_systematic
;
 ?
;
_chemical_name_common             ?
_chemical_melting_point           ?
_chemical_formula_moiety          ?
_chemical_formula_sum
 'C12 H31 N O3 Si4'
_chemical_formula_weight          349.74
 
loop_
 _atom_type_symbol
 _atom_type_description
 _atom_type_scat_dispersion_real
 _atom_type_scat_dispersion_imag
 _atom_type_scat_source
 'C'  'C'   0.0033   0.0016
 'International Tables Vol C Tables 4.2.6.8 and 6.1.1.4'
 'H'  'H'   0.0000   0.0000
 'International Tables Vol C Tables 4.2.6.8 and 6.1.1.4'
 'N'  'N'   0.0061   0.0033
 'International Tables Vol C Tables 4.2.6.8 and 6.1.1.4'
 'O'  'O'   0.0106   0.0060
 'International Tables Vol C Tables 4.2.6.8 and 6.1.1.4'
 'Si'  'Si'   0.0817   0.0704
 'International Tables Vol C Tables 4.2.6.8 and 6.1.1.4'
 
_symmetry_cell_setting            triclinic
_symmetry_space_group_name_H-M    P-1
 
loop_
 _symmetry_equiv_pos_as_xyz
 'x, y, z'
 '-x, -y, -z'
 
_cell_length_a                    7.679(3)
_cell_length_b                    11.337(4)
_cell_length_c                    12.014(5)
_cell_angle_alpha                 88.725(6)
_cell_angle_beta                  87.958(6)
_cell_angle_gamma                 70.280(6)
_cell_volume                      983.9(7)
_cell_formula_units_Z             2
_cell_measurement_temperature     100(2)
_cell_measurement_reflns_used     4281
_cell_measurement_theta_min       5.056
_cell_measurement_theta_max       52.499
 
_exptl_crystal_description        blocks
_exptl_crystal_colour             colorless
_exptl_crystal_size_max           0.20
_exptl_crystal_size_mid           0.11
_exptl_crystal_size_min           0.08
_exptl_crystal_density_meas       ?
_exptl_crystal_density_diffrn     1.181
_exptl_crystal_density_method     'not measured'
_exptl_crystal_F_000              380
_exptl_absorpt_coefficient_mu     0.308
_exptl_absorpt_correction_type    multi-scan
_exptl_absorpt_correction_T_min   0.9410
_exptl_absorpt_correction_T_max   0.9758
_exptl_absorpt_process_details    SADABAS
 
_exptl_special_details
;
 ?
;
 
_diffrn_ambient_temperature       100(2)
_diffrn_radiation_wavelength      0.71073
_diffrn_radiation_type            MoK\a
_diffrn_radiation_source          'fine-focus sealed tube'
_diffrn_radiation_monochromator   graphite
_diffrn_measurement_device_type   'SMART APEX' 
_diffrn_measurement_method        '\w scans'
_diffrn_detector_area_resol_mean  ?
_diffrn_standards_number          ?
_diffrn_standards_interval_count  ?
_diffrn_standards_interval_time   ?
_diffrn_standards_decay_%         ?
_diffrn_reflns_number             7218
_diffrn_reflns_av_R_equivalents   0.0266
_diffrn_reflns_av_sigmaI/netI     0.0417
_diffrn_reflns_limit_h_min        -9
_diffrn_reflns_limit_h_max        9
_diffrn_reflns_limit_k_min        -13
_diffrn_reflns_limit_k_max        13
_diffrn_reflns_limit_l_min        -14
_diffrn_reflns_limit_l_max        14
_diffrn_reflns_theta_min          1.70
_diffrn_reflns_theta_max          25.50
_reflns_number_total              3571
_reflns_number_gt                 3238
_reflns_threshold_expression      >2sigma(I)
 
_computing_data_collection        'Bruker XSCANS'
_computing_cell_refinement        'Bruker XSCANS'
_computing_data_reduction         'Bruker SHELXTL'
_computing_structure_solution     'SHELXS-97 (Sheldrick, 1990)'
_computing_structure_refinement   'SHELXL-97 (Sheldrick, 1997)'
_computing_molecular_graphics     'Bruker SHELXTL'
_computing_publication_material   'Bruker SHELXTL'
 
_refine_special_details
;
 Refinement of F^2^ against ALL reflections.  The weighted R-factor wR and
 goodness of fit S are based on F^2^, conventional R-factors R are based
 on F, with F set to zero for negative F^2^. The threshold expression of
 F^2^ > 2sigma(F^2^) is used only for calculating R-factors(gt) etc. and is
 not relevant to the choice of reflections for refinement.  R-factors based
 on F^2^ are statistically about twice as large as those based on F, and R-
 factors based on ALL data will be even larger.
;
 
_refine_ls_structure_factor_coef  Fsqd
_refine_ls_matrix_type            full
_refine_ls_weighting_scheme       calc
_refine_ls_weighting_details
 'calc w=1/[\s^2^(Fo^2^)+(0.1156P)^2^+1.9288P] where P=(Fo^2^+2Fc^2^)/3'
_atom_sites_solution_primary      direct
_atom_sites_solution_secondary    difmap
_atom_sites_solution_hydrogens    geom
_refine_ls_hydrogen_treatment     mixed
_refine_ls_extinction_method      none
_refine_ls_extinction_coef        ?
_refine_ls_number_reflns          3571
_refine_ls_number_parameters      210
_refine_ls_number_restraints      0
_refine_ls_R_factor_all           0.0749
_refine_ls_R_factor_gt            0.0697
_refine_ls_wR_factor_ref          0.1966
_refine_ls_wR_factor_gt           0.1921
_refine_ls_goodness_of_fit_ref    1.082
_refine_ls_restrained_S_all       1.082
_refine_ls_shift/su_max           0.000
_refine_ls_shift/su_mean          0.000
 
loop_
 _atom_site_label
 _atom_site_type_symbol
 _atom_site_fract_x
 _atom_site_fract_y
 _atom_site_fract_z
 _atom_site_U_iso_or_equiv
 _atom_site_adp_type
 _atom_site_occupancy
 _atom_site_symmetry_multiplicity
 _atom_site_calc_flag
 _atom_site_refinement_flags
 _atom_site_disorder_assembly
 _atom_site_disorder_group
C2 C 0.2513(9) 0.4033(5) 0.3522(5) 0.0260(16) Uani 0.632(9) 1 d P A 1
H2A H 0.1211 0.4159 0.3350 0.031 Uiso 0.632(9) 1 calc PR A 1
H2B H 0.3173 0.4168 0.2834 0.031 Uiso 0.632(9) 1 calc PR A 1
C4 C 0.2465(9) 0.1864(6) 0.3532(5) 0.0274(16) Uani 0.632(9) 1 d P A 1
H4A H 0.2208 0.2026 0.2731 0.033 Uiso 0.632(9) 1 calc PR A 1
H4B H 0.3281 0.0984 0.3628 0.033 Uiso 0.632(9) 1 calc PR A 1
C22 C 0.3953(13) 0.4060(8) 0.3802(8) 0.020(3) Uani 0.368(9) 1 d P A 2
H22A H 0.5222 0.3927 0.4048 0.024 Uiso 0.368(9) 1 calc PR A 2
H22B H 0.3862 0.4329 0.3010 0.024 Uiso 0.368(9) 1 calc PR A 2
C44 C 0.2015(15) 0.2805(11) 0.3368(8) 0.023(3) Uani 0.368(9) 1 d P A 2
H44A H 0.2471 0.2348 0.2666 0.028 Uiso 0.368(9) 1 calc PR A 2
H44B H 0.1235 0.3675 0.3187 0.028 Uiso 0.368(9) 1 calc PR A 2
Si1 Si 0.25949(13) 0.29105(9) 0.57246(8) 0.0184(3) Uani 1 1 d . A .
Si2 Si 0.16381(13) 0.30771(9) 0.76177(8) 0.0176(3) Uani 1 1 d . . .
Si3 Si 0.33303(14) 0.40413(10) 0.86144(9) 0.0218(3) Uani 1 1 d . . .
Si4 Si 0.18456(16) 0.11523(10) 0.84266(8) 0.0250(3) Uani 1 1 d . . .
H90 H -0.027(6) 0.387(4) 0.775(4) 0.036(12) Uiso 1 1 d . . .
N1 N 0.3410(5) 0.2794(3) 0.3986(3) 0.0288(8) Uani 1 1 d . . .
O1 O 0.2335(4) 0.4427(2) 0.5532(2) 0.0258(6) Uani 1 1 d . . .
O2 O 0.0995(4) 0.2338(3) 0.5286(2) 0.0272(6) Uani 1 1 d . . .
O3 O 0.4734(3) 0.1881(2) 0.5874(2) 0.0246(6) Uani 1 1 d . . .
C1 C 0.2622(5) 0.4948(4) 0.4475(3) 0.0246(8) Uani 1 1 d . A .
H1A H 0.3849 0.5056 0.4442 0.029 Uiso 1 1 calc R B 1
H1B H 0.1663 0.5780 0.4371 0.029 Uiso 1 1 calc R B 1
C3 C 0.0820(7) 0.2088(4) 0.4154(3) 0.0358(10) Uani 1 1 d . A .
H3A H 0.0418 0.1347 0.4112 0.043 Uiso 1 1 calc R C 1
H3B H -0.0152 0.2811 0.3824 0.043 Uiso 1 1 calc R C 1
C5 C 0.6019(6) 0.1480(5) 0.4976(4) 0.0467(13) Uani 1 1 d . A .
H5A H 0.6336 0.0565 0.4888 0.056 Uiso 1 1 calc R . .
H5B H 0.7168 0.1644 0.5149 0.056 Uiso 1 1 calc R . .
C6 C 0.5323(6) 0.2105(6) 0.3934(4) 0.0596(17) Uani 1 1 d . A .
H6A H 0.6008 0.2679 0.3722 0.072 Uiso 1 1 calc R . .
H6B H 0.5567 0.1468 0.3344 0.072 Uiso 1 1 calc R . .
C7 C 0.5852(5) 0.3279(4) 0.8246(4) 0.0359(10) Uani 1 1 d . . .
H7A H 0.6043 0.3310 0.7437 0.054 Uiso 1 1 calc R . .
H7B H 0.6263 0.2403 0.8501 0.054 Uiso 1 1 calc R . .
H7C H 0.6568 0.3724 0.8608 0.054 Uiso 1 1 calc R . .
C8 C 0.2997(6) 0.3905(4) 1.0168(3) 0.0337(10) Uani 1 1 d . . .
H8A H 0.3607 0.4409 1.0546 0.051 Uiso 1 1 calc R . .
H8B H 0.3540 0.3026 1.0400 0.051 Uiso 1 1 calc R . .
H8C H 0.1672 0.4209 1.0365 0.051 Uiso 1 1 calc R . .
C9 C 0.2558(6) 0.5750(4) 0.8230(4) 0.0312(9) Uani 1 1 d . . .
H9A H 0.3280 0.6160 0.8634 0.047 Uiso 1 1 calc R . .
H9B H 0.1242 0.6140 0.8430 0.047 Uiso 1 1 calc R . .
H9C H 0.2748 0.5843 0.7427 0.047 Uiso 1 1 calc R . .
C10 C 0.0843(7) 0.1342(4) 0.9886(3) 0.0390(11) Uani 1 1 d . . .
H10A H -0.0498 0.1771 0.9868 0.059 Uiso 1 1 calc R . .
H10B H 0.1405 0.1838 1.0315 0.059 Uiso 1 1 calc R . .
H10C H 0.1098 0.0515 1.0238 0.059 Uiso 1 1 calc R . .
C11 C 0.4365(6) 0.0179(4) 0.8496(4) 0.0364(10) Uani 1 1 d . . .
H11A H 0.4483 -0.0682 0.8716 0.055 Uiso 1 1 calc R . .
H11B H 0.4956 0.0535 0.9045 0.055 Uiso 1 1 calc R . .
H11C H 0.4968 0.0177 0.7763 0.055 Uiso 1 1 calc R . .
C12 C 0.0634(6) 0.0320(4) 0.7567(3) 0.0310(9) Uani 1 1 d . . .
H12A H 0.0912 -0.0541 0.7845 0.046 Uiso 1 1 calc R . .
H12B H 0.1063 0.0307 0.6788 0.046 Uiso 1 1 calc R . .
H12C H -0.0704 0.0761 0.7620 0.046 Uiso 1 1 calc R . .
 
loop_
 _atom_site_aniso_label
 _atom_site_aniso_U_11
 _atom_site_aniso_U_22
 _atom_site_aniso_U_33
 _atom_site_aniso_U_23
 _atom_site_aniso_U_13
 _atom_site_aniso_U_12
C2 0.027(4) 0.023(3) 0.025(3) 0.004(2) 0.000(2) -0.005(2)
C4 0.037(4) 0.025(4) 0.022(3) -0.002(3) 0.001(3) -0.012(3)
C22 0.020(5) 0.015(5) 0.026(5) 0.005(4) 0.002(4) -0.008(4)
C44 0.033(6) 0.031(7) 0.011(5) 0.003(4) -0.002(4) -0.018(5)
Si1 0.0180(5) 0.0207(5) 0.0145(5) 0.0022(4) 0.0011(4) -0.0042(4)
Si2 0.0181(5) 0.0203(5) 0.0145(5) 0.0009(4) 0.0006(4) -0.0067(4)
Si3 0.0204(5) 0.0251(6) 0.0217(6) -0.0008(4) -0.0017(4) -0.0099(4)
Si4 0.0401(7) 0.0216(6) 0.0147(5) -0.0014(4) 0.0036(4) -0.0128(5)
N1 0.0330(18) 0.0266(17) 0.0179(17) 0.0033(13) 0.0050(13) 0.0007(14)
O1 0.0314(15) 0.0190(13) 0.0235(14) 0.0030(11) 0.0069(11) -0.0050(11)
O2 0.0268(14) 0.0345(15) 0.0197(14) -0.0051(11) -0.0010(11) -0.0092(12)
O3 0.0209(13) 0.0282(14) 0.0191(14) 0.0019(11) 0.0013(10) -0.0014(11)
C1 0.028(2) 0.0259(19) 0.0194(19) 0.0101(15) -0.0020(15) -0.0095(16)
C3 0.063(3) 0.026(2) 0.021(2) 0.0003(17) -0.0111(19) -0.018(2)
C5 0.028(2) 0.055(3) 0.037(3) 0.016(2) 0.0157(19) 0.009(2)
C6 0.025(2) 0.107(5) 0.024(2) -0.001(3) 0.0050(18) 0.007(3)
C7 0.0178(19) 0.039(2) 0.052(3) -0.006(2) 0.0000(18) -0.0116(17)
C8 0.041(2) 0.045(3) 0.023(2) -0.0034(18) -0.0065(17) -0.023(2)
C9 0.031(2) 0.028(2) 0.038(2) 0.0014(18) -0.0045(18) -0.0153(17)
C10 0.069(3) 0.040(2) 0.019(2) -0.0031(18) 0.011(2) -0.034(2)
C11 0.051(3) 0.025(2) 0.025(2) 0.0010(17) -0.0082(18) -0.0003(18)
C12 0.042(2) 0.031(2) 0.026(2) -0.0066(17) 0.0059(17) -0.0201(19)
 
_geom_special_details
;
 All esds (except the esd in the dihedral angle between two l.s. planes)
 are estimated using the full covariance matrix.  The cell esds are taken
 into account individually in the estimation of esds in distances, angles
 and torsion angles; correlations between esds in cell parameters are only
 used when they are defined by crystal symmetry.  An approximate (isotropic)
 treatment of cell esds is used for estimating esds involving l.s. planes.
;
 
loop_
 _geom_bond_atom_site_label_1
 _geom_bond_atom_site_label_2
 _geom_bond_distance
 _geom_bond_site_symmetry_2
 _geom_bond_publ_flag
C2 N1 1.448(7) . ?
C2 C1 1.584(7) . ?
C4 C3 1.394(8) . ?
C4 N1 1.584(7) . ?
C22 C1 1.412(10) . ?
C22 N1 1.632(9) . ?
C44 N1 1.322(10) . ?
C44 C3 1.675(11) . ?
Si1 O1 1.674(3) . ?
Si1 O2 1.676(3) . ?
Si1 O3 1.677(3) . ?
Si1 N1 2.153(3) . ?
Si1 Si2 2.3568(16) . ?
Si2 Si4 2.3268(16) . ?
Si2 Si3 2.3334(15) . ?
Si3 C7 1.876(4) . ?
Si3 C9 1.877(4) . ?
Si3 C8 1.885(4) . ?
Si4 C10 1.877(4) . ?
Si4 C12 1.877(4) . ?
Si4 C11 1.880(4) . ?
N1 C6 1.412(6) . ?
O1 C1 1.429(4) . ?
O2 C3 1.415(5) . ?
O3 C5 1.410(5) . ?
C5 C6 1.451(7) . ?
 
loop_
 _geom_angle_atom_site_label_1
 _geom_angle_atom_site_label_2
 _geom_angle_atom_site_label_3
 _geom_angle
 _geom_angle_site_symmetry_1
 _geom_angle_site_symmetry_3
 _geom_angle_publ_flag
N1 C2 C1 103.9(4) . . ?
C3 C4 N1 106.1(4) . . ?
C1 C22 N1 103.2(6) . . ?
N1 C44 C3 104.8(7) . . ?
O1 Si1 O2 120.43(15) . . ?
O1 Si1 O3 118.68(14) . . ?
O2 Si1 O3 116.61(15) . . ?
O1 Si1 N1 83.07(13) . . ?
O2 Si1 N1 82.91(14) . . ?
O3 Si1 N1 83.28(13) . . ?
O1 Si1 Si2 96.09(10) . . ?
O2 Si1 Si2 96.63(10) . . ?
O3 Si1 Si2 98.06(10) . . ?
N1 Si1 Si2 178.64(10) . . ?
Si4 Si2 Si3 110.43(6) . . ?
Si4 Si2 Si1 112.66(5) . . ?
Si3 Si2 Si1 110.45(5) . . ?
C7 Si3 C9 110.2(2) . . ?
C7 Si3 C8 108.4(2) . . ?
C9 Si3 C8 108.1(2) . . ?
C7 Si3 Si2 108.72(15) . . ?
C9 Si3 Si2 108.90(14) . . ?
C8 Si3 Si2 112.57(13) . . ?
C10 Si4 C12 109.8(2) . . ?
C10 Si4 C11 107.8(2) . . ?
C12 Si4 C11 109.3(2) . . ?
C10 Si4 Si2 111.41(15) . . ?
C12 Si4 Si2 110.54(14) . . ?
C11 Si4 Si2 108.01(15) . . ?
C44 N1 C6 133.0(6) . . ?
C44 N1 C2 69.4(6) . . ?
C6 N1 C2 126.5(4) . . ?
C44 N1 C4 39.9(5) . . ?
C6 N1 C4 104.4(4) . . ?
C2 N1 C4 109.2(4) . . ?
C44 N1 C22 112.0(6) . . ?
C6 N1 C22 87.7(5) . . ?
C2 N1 C22 44.4(4) . . ?
C4 N1 C22 148.7(5) . . ?
C44 N1 Si1 110.4(5) . . ?
C6 N1 Si1 106.2(3) . . ?
C2 N1 Si1 105.8(3) . . ?
C4 N1 Si1 102.3(3) . . ?
C22 N1 Si1 101.8(4) . . ?
C1 O1 Si1 123.2(2) . . ?
C3 O2 Si1 123.2(3) . . ?
C5 O3 Si1 123.0(3) . . ?
C22 C1 O1 111.9(5) . . ?
C22 C1 C2 45.8(5) . . ?
O1 C1 C2 109.0(3) . . ?
C4 C3 O2 112.8(4) . . ?
C4 C3 C44 37.5(5) . . ?
O2 C3 C44 108.4(4) . . ?
O3 C5 C6 112.7(4) . . ?
N1 C6 C5 113.4(4) . . ?
 
loop_
 _geom_torsion_atom_site_label_1
 _geom_torsion_atom_site_label_2
 _geom_torsion_atom_site_label_3
 _geom_torsion_atom_site_label_4
 _geom_torsion
 _geom_torsion_site_symmetry_1
 _geom_torsion_site_symmetry_2
 _geom_torsion_site_symmetry_3
 _geom_torsion_site_symmetry_4
 _geom_torsion_publ_flag
O1 Si1 Si2 Si4 -177.06(11) . . . . ?
O2 Si1 Si2 Si4 61.26(11) . . . . ?
O3 Si1 Si2 Si4 -56.89(11) . . . . ?
N1 Si1 Si2 Si4 131(5) . . . . ?
O1 Si1 Si2 Si3 -53.04(11) . . . . ?
O2 Si1 Si2 Si3 -174.72(11) . . . . ?
O3 Si1 Si2 Si3 67.13(11) . . . . ?
N1 Si1 Si2 Si3 -105(5) . . . . ?
Si4 Si2 Si3 C7 77.33(17) . . . . ?
Si1 Si2 Si3 C7 -47.96(17) . . . . ?
Si4 Si2 Si3 C9 -162.62(15) . . . . ?
Si1 Si2 Si3 C9 72.08(16) . . . . ?
Si4 Si2 Si3 C8 -42.77(17) . . . . ?
Si1 Si2 Si3 C8 -168.06(16) . . . . ?
Si3 Si2 Si4 C10 61.91(19) . . . . ?
Si1 Si2 Si4 C10 -174.07(18) . . . . ?
Si3 Si2 Si4 C12 -175.77(14) . . . . ?
Si1 Si2 Si4 C12 -51.75(15) . . . . ?
Si3 Si2 Si4 C11 -56.29(16) . . . . ?
Si1 Si2 Si4 C11 67.74(15) . . . . ?
C3 C44 N1 C6 106.8(7) . . . . ?
C3 C44 N1 C2 -131.9(7) . . . . ?
C3 C44 N1 C4 52.7(6) . . . . ?
C3 C44 N1 C22 -144.8(6) . . . . ?
C3 C44 N1 Si1 -32.1(8) . . . . ?
C1 C2 N1 C44 144.1(6) . . . . ?
C1 C2 N1 C6 -87.0(6) . . . . ?
C1 C2 N1 C4 147.3(4) . . . . ?
C1 C2 N1 C22 -53.0(6) . . . . ?
C1 C2 N1 Si1 37.8(4) . . . . ?
C3 C4 N1 C44 -74.0(8) . . . . ?
C3 C4 N1 C6 143.7(4) . . . . ?
C3 C4 N1 C2 -78.6(5) . . . . ?
C3 C4 N1 C22 -106.4(9) . . . . ?
C3 C4 N1 Si1 33.2(5) . . . . ?
C1 C22 N1 C44 80.5(8) . . . . ?
C1 C22 N1 C6 -143.5(6) . . . . ?
C1 C22 N1 C2 63.2(6) . . . . ?
C1 C22 N1 C4 102.2(9) . . . . ?
C1 C22 N1 Si1 -37.5(6) . . . . ?
O1 Si1 N1 C44 -99.0(6) . . . . ?
O2 Si1 N1 C44 22.9(6) . . . . ?
O3 Si1 N1 C44 140.9(6) . . . . ?
Si2 Si1 N1 C44 -47(5) . . . . ?
O1 Si1 N1 C6 111.0(4) . . . . ?
O2 Si1 N1 C6 -127.0(4) . . . . ?
O3 Si1 N1 C6 -9.1(4) . . . . ?
Si2 Si1 N1 C6 163(5) . . . . ?
O1 Si1 N1 C2 -25.6(3) . . . . ?
O2 Si1 N1 C2 96.4(3) . . . . ?
O3 Si1 N1 C2 -145.7(3) . . . . ?
Si2 Si1 N1 C2 26(5) . . . . ?
O1 Si1 N1 C4 -139.9(3) . . . . ?
O2 Si1 N1 C4 -17.9(3) . . . . ?
O3 Si1 N1 C4 100.1(3) . . . . ?
Si2 Si1 N1 C4 -88(5) . . . . ?
O1 Si1 N1 C22 20.0(4) . . . . ?
O2 Si1 N1 C22 142.0(4) . . . . ?
O3 Si1 N1 C22 -100.0(4) . . . . ?
Si2 Si1 N1 C22 72(5) . . . . ?
O2 Si1 O1 C1 -75.0(3) . . . . ?
O3 Si1 O1 C1 81.0(3) . . . . ?
N1 Si1 O1 C1 2.6(3) . . . . ?
Si2 Si1 O1 C1 -176.4(3) . . . . ?
O1 Si1 O2 C3 76.1(3) . . . . ?
O3 Si1 O2 C3 -80.4(3) . . . . ?
N1 Si1 O2 C3 -1.6(3) . . . . ?
Si2 Si1 O2 C3 177.1(3) . . . . ?
O1 Si1 O3 C5 -74.9(4) . . . . ?
O2 Si1 O3 C5 82.0(4) . . . . ?
N1 Si1 O3 C5 3.4(4) . . . . ?
Si2 Si1 O3 C5 -176.4(3) . . . . ?
N1 C22 C1 O1 42.9(7) . . . . ?
N1 C22 C1 C2 -52.8(5) . . . . ?
Si1 O1 C1 C22 -29.7(6) . . . . ?
Si1 O1 C1 C2 19.3(4) . . . . ?
N1 C2 C1 C22 64.3(6) . . . . ?
N1 C2 C1 O1 -38.1(5) . . . . ?
N1 C4 C3 O2 -37.7(6) . . . . ?
N1 C4 C3 C44 53.1(6) . . . . ?
Si1 O2 C3 C4 24.8(5) . . . . ?
Si1 O2 C3 C44 -15.1(6) . . . . ?
N1 C44 C3 C4 -72.1(8) . . . . ?
N1 C44 C3 O2 31.6(8) . . . . ?
Si1 O3 C5 C6 3.1(7) . . . . ?
C44 N1 C6 C5 -127.5(8) . . . . ?
C2 N1 C6 C5 137.3(6) . . . . ?
C4 N1 C6 C5 -95.0(6) . . . . ?
C22 N1 C6 C5 114.2(6) . . . . ?
Si1 N1 C6 C5 12.6(6) . . . . ?
O3 C5 C6 N1 -11.3(8) . . . . ?
 
_diffrn_measured_fraction_theta_max    0.976
_diffrn_reflns_theta_full              25.50
_diffrn_measured_fraction_theta_full   0.976
_refine_diff_density_max    1.006
_refine_diff_density_min   -0.422
_refine_diff_density_rms    0.118

# start Validation Reply Form
_vrf_PLAT410_1158j
;
PROBLEM: Short Intra H...H Contact H1A .. H22A .. 1.43 Ang.
RESPONSE: Disorder, solved with PART instructions
;
# end Validation Reply Form

#===END

data_7_1159j
 
_audit_creation_method            SHELXL-97
_chemical_name_systematic
;
 ?
;
_chemical_name_common             ?
_chemical_melting_point           ?
_chemical_formula_moiety          ?
_chemical_formula_sum
 'C32 H76 N2 O8 Si8 Yb'
_chemical_formula_weight          1014.71
 
loop_
 _atom_type_symbol
 _atom_type_description
 _atom_type_scat_dispersion_real
 _atom_type_scat_dispersion_imag
 _atom_type_scat_source
 'C'  'C'   0.0033   0.0016
 'International Tables Vol C Tables 4.2.6.8 and 6.1.1.4'
 'H'  'H'   0.0000   0.0000
 'International Tables Vol C Tables 4.2.6.8 and 6.1.1.4'
 'N'  'N'   0.0061   0.0033
 'International Tables Vol C Tables 4.2.6.8 and 6.1.1.4'
 'O'  'O'   0.0106   0.0060
 'International Tables Vol C Tables 4.2.6.8 and 6.1.1.4'
 'Si'  'Si'   0.0817   0.0704
 'International Tables Vol C Tables 4.2.6.8 and 6.1.1.4'
 'Yb'  'Yb'  -0.3850   5.5486
 'International Tables Vol C Tables 4.2.6.8 and 6.1.1.4'
 
_symmetry_cell_setting            triclinic
_symmetry_space_group_name_H-M    P-1
 
loop_
 _symmetry_equiv_pos_as_xyz
 'x, y, z'
 '-x, -y, -z'
 
_cell_length_a                    9.9691(12)
_cell_length_b                    15.4589(19)
_cell_length_c                    16.395(2)
_cell_angle_alpha                 81.587(3)
_cell_angle_beta                  87.487(2)
_cell_angle_gamma                 86.698(3)
_cell_volume                      2493.7(5)
_cell_formula_units_Z             2
_cell_measurement_temperature     100(2)
_cell_measurement_reflns_used     2112
_cell_measurement_theta_min       4.722
_cell_measurement_theta_max       48.800
 
_exptl_crystal_description        needles
_exptl_crystal_colour             orange
_exptl_crystal_size_max           0.12
_exptl_crystal_size_mid           0.08
_exptl_crystal_size_min           0.06
_exptl_crystal_density_meas       ?
_exptl_crystal_density_diffrn     1.351
_exptl_crystal_density_method     'not measured'
_exptl_crystal_F_000              1056
_exptl_absorpt_coefficient_mu     2.109
_exptl_absorpt_correction_type    multi-scan
_exptl_absorpt_correction_T_min   0.7859
_exptl_absorpt_correction_T_max   0.8839
_exptl_absorpt_process_details    SADABS
 
_exptl_special_details
;
 ?
;
 
_diffrn_ambient_temperature       100(2)
_diffrn_radiation_wavelength      0.71073
_diffrn_radiation_type            MoK\a
_diffrn_radiation_source          'fine-focus sealed tube'
_diffrn_radiation_monochromator   graphite
_diffrn_measurement_device_type   'SMART APEX' 
_diffrn_measurement_method        '\w scans'
_diffrn_detector_area_resol_mean  ?
_diffrn_standards_number          ?
_diffrn_standards_interval_count  ?
_diffrn_standards_interval_time   ?
_diffrn_standards_decay_%         ?
_diffrn_reflns_number             20142
_diffrn_reflns_av_R_equivalents   0.0849
_diffrn_reflns_av_sigmaI/netI     0.1488
_diffrn_reflns_limit_h_min        -12
_diffrn_reflns_limit_h_max        12
_diffrn_reflns_limit_k_min        -19
_diffrn_reflns_limit_k_max        19
_diffrn_reflns_limit_l_min        -20
_diffrn_reflns_limit_l_max        20
_diffrn_reflns_theta_min          1.70
_diffrn_reflns_theta_max          26.36
_reflns_number_total              10041
_reflns_number_gt                 7449
_reflns_threshold_expression      >2sigma(I)
 
_computing_data_collection        'Bruker XSCANS'
_computing_cell_refinement        'Bruker XSCANS'
_computing_data_reduction         'Bruker SHELXTL'
_computing_structure_solution     'SHELXS-97 (Sheldrick, 1990)'
_computing_structure_refinement   'SHELXL-97 (Sheldrick, 1997)'
_computing_molecular_graphics     'Bruker SHELXTL'
_computing_publication_material   'Bruker SHELXTL'
 
_refine_special_details
;
 Refinement of F^2^ against ALL reflections.  The weighted R-factor wR and
 goodness of fit S are based on F^2^, conventional R-factors R are based
 on F, with F set to zero for negative F^2^. The threshold expression of
 F^2^ > 2sigma(F^2^) is used only for calculating R-factors(gt) etc. and is
 not relevant to the choice of reflections for refinement.  R-factors based
 on F^2^ are statistically about twice as large as those based on F, and R-
 factors based on ALL data will be even larger.
;
 
_refine_ls_structure_factor_coef  Fsqd
_refine_ls_matrix_type            full
_refine_ls_weighting_scheme       calc
_refine_ls_weighting_details
 'calc w=1/[\s^2^(Fo^2^)+(0.1000P)^2^+0.0000P] where P=(Fo^2^+2Fc^2^)/3'
_atom_sites_solution_primary      direct
_atom_sites_solution_secondary    difmap
_atom_sites_solution_hydrogens    geom
_refine_ls_hydrogen_treatment     constr
_refine_ls_extinction_method      none
_refine_ls_extinction_coef        ?
_refine_ls_number_reflns          10041
_refine_ls_number_parameters      472
_refine_ls_number_restraints      0
_refine_ls_R_factor_all           0.1130
_refine_ls_R_factor_gt            0.0807
_refine_ls_wR_factor_ref          0.1910
_refine_ls_wR_factor_gt           0.1730
_refine_ls_goodness_of_fit_ref    0.950
_refine_ls_restrained_S_all       0.950
_refine_ls_shift/su_max           0.005
_refine_ls_shift/su_mean          0.000
 
loop_
 _atom_site_label
 _atom_site_type_symbol
 _atom_site_fract_x
 _atom_site_fract_y
 _atom_site_fract_z
 _atom_site_U_iso_or_equiv
 _atom_site_adp_type
 _atom_site_occupancy
 _atom_site_symmetry_multiplicity
 _atom_site_calc_flag
 _atom_site_refinement_flags
 _atom_site_disorder_assembly
 _atom_site_disorder_group
Yb1 Yb 0.33765(4) 0.22981(3) 0.24249(3) 0.01647(14) Uani 1 1 d . . .
Si1 Si 0.2249(3) 0.05269(17) 0.24297(16) 0.0203(6) Uani 1 1 d . . .
Si2 Si -0.0028(3) 0.05656(18) 0.28058(17) 0.0217(6) Uani 1 1 d . . .
Si3 Si 0.2070(3) 0.11046(17) 0.10424(16) 0.0194(6) Uani 1 1 d . . .
Si4 Si 0.2962(3) -0.09522(18) 0.25387(17) 0.0214(6) Uani 1 1 d . . .
Si5 Si 0.2983(3) 0.42663(18) 0.23564(17) 0.0231(6) Uani 1 1 d . . .
Si6 Si 0.2144(3) 0.37834(17) 0.36760(17) 0.0214(6) Uani 1 1 d . . .
Si7 Si 0.4437(3) 0.53173(19) 0.26155(19) 0.0279(7) Uani 1 1 d . . .
Si8 Si 0.1080(3) 0.50619(19) 0.17990(19) 0.0283(7) Uani 1 1 d . . .
N1 N 0.2085(8) 0.2050(5) -0.0505(5) 0.0218(18) Uani 1 1 d . . .
N2 N 0.1090(9) 0.3062(5) 0.5239(5) 0.029(2) Uani 1 1 d . . .
O1 O 0.2297(6) 0.2164(4) 0.1148(4) 0.0205(15) Uani 1 1 d . . .
O2 O 0.3296(7) 0.0684(4) 0.0492(4) 0.0252(16) Uani 1 1 d . . .
O3 O 0.0590(6) 0.1035(4) 0.0661(4) 0.0221(15) Uani 1 1 d . . .
O4 O 0.2077(7) 0.2678(4) 0.3681(4) 0.0237(15) Uani 1 1 d . . .
O5 O 0.3212(7) 0.3916(5) 0.4386(4) 0.0309(17) Uani 1 1 d . . .
O6 O 0.0628(7) 0.4227(4) 0.3833(4) 0.0292(17) Uani 1 1 d . . .
O7 O 0.5097(7) 0.1821(5) 0.3444(4) 0.0275(16) Uani 1 1 d . . .
O8 O 0.5371(7) 0.2223(5) 0.1548(5) 0.0353(19) Uani 1 1 d . . .
C1 C -0.0727(11) 0.1733(7) 0.2557(7) 0.032(3) Uani 1 1 d . . .
H1A H -0.1669 0.1771 0.2751 0.049 Uiso 1 1 calc R . .
H1B H -0.0668 0.1916 0.1959 0.049 Uiso 1 1 calc R . .
H1C H -0.0205 0.2118 0.2831 0.049 Uiso 1 1 calc R . .
C2 C -0.0327(11) 0.0259(7) 0.3964(6) 0.033(3) Uani 1 1 d . . .
H2A H 0.0091 0.0681 0.4253 0.050 Uiso 1 1 calc R . .
H2B H 0.0070 -0.0329 0.4140 0.050 Uiso 1 1 calc R . .
H2C H -0.1296 0.0270 0.4096 0.050 Uiso 1 1 calc R . .
C3 C -0.1079(10) -0.0205(7) 0.2327(6) 0.029(2) Uani 1 1 d . . .
H3A H -0.2017 -0.0146 0.2526 0.043 Uiso 1 1 calc R . .
H3B H -0.0732 -0.0810 0.2484 0.043 Uiso 1 1 calc R . .
H3C H -0.1030 -0.0057 0.1725 0.043 Uiso 1 1 calc R . .
C4 C 0.2032(11) -0.1600(7) 0.3438(6) 0.033(3) Uani 1 1 d . . .
H4A H 0.1093 -0.1638 0.3299 0.050 Uiso 1 1 calc R . .
H4B H 0.2065 -0.1305 0.3927 0.050 Uiso 1 1 calc R . .
H4C H 0.2456 -0.2190 0.3553 0.050 Uiso 1 1 calc R . .
C5 C 0.4800(10) -0.1083(7) 0.2765(7) 0.031(3) Uani 1 1 d . . .
H5A H 0.5099 -0.1702 0.2802 0.047 Uiso 1 1 calc R . .
H5B H 0.4944 -0.0876 0.3290 0.047 Uiso 1 1 calc R . .
H5C H 0.5315 -0.0739 0.2322 0.047 Uiso 1 1 calc R . .
C6 C 0.2727(11) -0.1503(7) 0.1617(7) 0.033(3) Uani 1 1 d . . .
H6A H 0.3089 -0.1145 0.1121 0.049 Uiso 1 1 calc R . .
H6B H 0.1766 -0.1571 0.1557 0.049 Uiso 1 1 calc R . .
H6C H 0.3202 -0.2080 0.1688 0.049 Uiso 1 1 calc R . .
C7 C 0.4865(13) 0.6051(8) 0.1631(7) 0.048(3) Uani 1 1 d . . .
H7A H 0.4039 0.6342 0.1398 0.071 Uiso 1 1 calc R . .
H7B H 0.5310 0.5701 0.1235 0.071 Uiso 1 1 calc R . .
H7C H 0.5469 0.6493 0.1746 0.071 Uiso 1 1 calc R . .
C8 C 0.3791(12) 0.6032(7) 0.3392(8) 0.043(3) Uani 1 1 d . . .
H8A H 0.4435 0.6480 0.3426 0.065 Uiso 1 1 calc R . .
H8B H 0.3678 0.5674 0.3933 0.065 Uiso 1 1 calc R . .
H8C H 0.2923 0.6316 0.3222 0.065 Uiso 1 1 calc R . .
C9 C 0.6105(11) 0.4812(7) 0.3011(8) 0.039(3) Uani 1 1 d . . .
H9A H 0.6515 0.4444 0.2619 0.058 Uiso 1 1 calc R . .
H9B H 0.5958 0.4454 0.3548 0.058 Uiso 1 1 calc R . .
H9C H 0.6706 0.5278 0.3069 0.058 Uiso 1 1 calc R . .
C10 C 0.0482(12) 0.6047(7) 0.2294(8) 0.043(3) Uani 1 1 d . . .
H10A H -0.0394 0.6271 0.2081 0.065 Uiso 1 1 calc R . .
H10B H 0.1133 0.6504 0.2165 0.065 Uiso 1 1 calc R . .
H10C H 0.0396 0.5880 0.2893 0.065 Uiso 1 1 calc R . .
C11 C 0.1436(13) 0.5479(8) 0.0667(7) 0.045(3) Uani 1 1 d . . .
H11A H 0.1818 0.4996 0.0389 0.067 Uiso 1 1 calc R . .
H11B H 0.2077 0.5942 0.0618 0.067 Uiso 1 1 calc R . .
H11C H 0.0597 0.5712 0.0409 0.067 Uiso 1 1 calc R . .
C12 C -0.0397(11) 0.4354(8) 0.1858(7) 0.038(3) Uani 1 1 d . . .
H12A H -0.0705 0.4208 0.2435 0.057 Uiso 1 1 calc R . .
H12B H -0.0131 0.3815 0.1631 0.057 Uiso 1 1 calc R . .
H12C H -0.1127 0.4670 0.1538 0.057 Uiso 1 1 calc R . .
C13 C 0.1782(11) 0.2920(6) 0.0598(6) 0.028(2) Uani 1 1 d . . .
H13A H 0.2037 0.3462 0.0795 0.033 Uiso 1 1 calc R . .
H13B H 0.0788 0.2924 0.0606 0.033 Uiso 1 1 calc R . .
C14 C 0.2329(11) 0.2907(6) -0.0272(6) 0.027(2) Uani 1 1 d . . .
H14A H 0.1875 0.3379 -0.0652 0.032 Uiso 1 1 calc R . .
H14B H 0.3305 0.3001 -0.0304 0.032 Uiso 1 1 calc R . .
C15 C 0.4082(10) 0.1132(7) -0.0175(6) 0.026(2) Uani 1 1 d . . .
H15A H 0.4750 0.0713 -0.0388 0.031 Uiso 1 1 calc R . .
H15B H 0.4576 0.1592 0.0027 0.031 Uiso 1 1 calc R . .
C16 C 0.3171(10) 0.1549(7) -0.0869(6) 0.029(2) Uani 1 1 d . . .
H16A H 0.3689 0.1937 -0.1286 0.034 Uiso 1 1 calc R . .
H16B H 0.2804 0.1089 -0.1143 0.034 Uiso 1 1 calc R . .
C17 C 0.0723(10) 0.1896(7) -0.0705(6) 0.028(2) Uani 1 1 d . . .
H17A H 0.0675 0.1861 -0.1301 0.033 Uiso 1 1 calc R . .
H17B H 0.0097 0.2379 -0.0569 0.033 Uiso 1 1 calc R . .
C18 C 0.0342(10) 0.1030(7) -0.0194(6) 0.030(2) Uani 1 1 d . . .
H18A H -0.0621 0.0941 -0.0259 0.036 Uiso 1 1 calc R . .
H18B H 0.0877 0.0539 -0.0397 0.036 Uiso 1 1 calc R . .
C19 C 0.2219(11) 0.2032(7) 0.4407(7) 0.030(2) Uani 1 1 d . . .
H19A H 0.3116 0.2066 0.4634 0.036 Uiso 1 1 calc R . .
H19B H 0.2165 0.1440 0.4250 0.036 Uiso 1 1 calc R . .
C20 C 0.1149(11) 0.2164(6) 0.5061(7) 0.030(3) Uani 1 1 d . . .
H20A H 0.0266 0.2029 0.4872 0.036 Uiso 1 1 calc R . .
H20B H 0.1346 0.1757 0.5571 0.036 Uiso 1 1 calc R . .
C21 C -0.0477(11) 0.3814(7) 0.4264(7) 0.030(2) Uani 1 1 d . . .
H21A H -0.0656 0.3280 0.4027 0.036 Uiso 1 1 calc R . .
H21B H -0.1290 0.4214 0.4205 0.036 Uiso 1 1 calc R . .
C22 C -0.0172(10) 0.3566(7) 0.5184(7) 0.034(3) Uani 1 1 d . . .
H22A H -0.0115 0.4101 0.5444 0.040 Uiso 1 1 calc R . .
H22B H -0.0897 0.3217 0.5474 0.040 Uiso 1 1 calc R . .
C23 C 0.2171(12) 0.3325(8) 0.5702(7) 0.042(3) Uani 1 1 d . . .
H23A H 0.2839 0.2829 0.5827 0.050 Uiso 1 1 calc R . .
H23B H 0.1806 0.3495 0.6230 0.050 Uiso 1 1 calc R . .
C24 C 0.2847(12) 0.4101(7) 0.5188(6) 0.033(3) Uani 1 1 d . . .
H24A H 0.2222 0.4626 0.5149 0.040 Uiso 1 1 calc R . .
H24B H 0.3659 0.4231 0.5465 0.040 Uiso 1 1 calc R . .
C25 C 0.5859(10) 0.2466(7) 0.3743(7) 0.034(3) Uani 1 1 d . . .
H25A H 0.5243 0.2925 0.3936 0.041 Uiso 1 1 calc R . .
H25B H 0.6453 0.2746 0.3293 0.041 Uiso 1 1 calc R . .
C26 C 0.6677(12) 0.2024(8) 0.4434(8) 0.044(3) Uani 1 1 d . . .
H26A H 0.6662 0.2375 0.4893 0.053 Uiso 1 1 calc R . .
H26B H 0.7621 0.1908 0.4249 0.053 Uiso 1 1 calc R . .
C27 C 0.5954(12) 0.1166(7) 0.4686(7) 0.035(3) Uani 1 1 d . . .
H27A H 0.6581 0.0690 0.4934 0.042 Uiso 1 1 calc R . .
H27B H 0.5196 0.1246 0.5084 0.042 Uiso 1 1 calc R . .
C28 C 0.5465(11) 0.0976(7) 0.3890(7) 0.033(3) Uani 1 1 d . . .
H28A H 0.6182 0.0673 0.3585 0.040 Uiso 1 1 calc R . .
H28B H 0.4679 0.0606 0.3983 0.040 Uiso 1 1 calc R . .
C29 C 0.6301(13) 0.2844(8) 0.1170(7) 0.043(3) Uani 1 1 d . . .
H29A H 0.6924 0.2982 0.1581 0.052 Uiso 1 1 calc R . .
H29B H 0.5817 0.3392 0.0929 0.052 Uiso 1 1 calc R . .
C30 C 0.7148(11) 0.1486(9) 0.0823(7) 0.043(3) Uani 1 1 d . . .
H30A H 0.8053 0.1304 0.1032 0.051 Uiso 1 1 calc R . .
H30B H 0.6961 0.1137 0.0384 0.051 Uiso 1 1 calc R . .
C31 C 0.7056(13) 0.2427(9) 0.0511(8) 0.054(4) Uani 1 1 d . . .
H31A H 0.6571 0.2540 -0.0011 0.064 Uiso 1 1 calc R . .
H31B H 0.7964 0.2658 0.0411 0.064 Uiso 1 1 calc R . .
C32 C 0.6082(10) 0.1369(7) 0.1517(7) 0.030(2) Uani 1 1 d . . .
H32A H 0.5443 0.0933 0.1413 0.035 Uiso 1 1 calc R . .
H32B H 0.6508 0.1158 0.2049 0.035 Uiso 1 1 calc R . .
 
loop_
 _atom_site_aniso_label
 _atom_site_aniso_U_11
 _atom_site_aniso_U_22
 _atom_site_aniso_U_33
 _atom_site_aniso_U_23
 _atom_site_aniso_U_13
 _atom_site_aniso_U_12
Yb1 0.0192(2) 0.0143(2) 0.0164(2) -0.00464(15) 0.00039(15) 0.00050(15)
Si1 0.0213(14) 0.0193(14) 0.0192(14) -0.0008(11) 0.0005(11) 0.0013(11)
Si2 0.0251(15) 0.0209(14) 0.0197(14) -0.0060(12) 0.0024(11) -0.0012(11)
Si3 0.0192(14) 0.0208(14) 0.0188(14) -0.0057(11) 0.0006(11) 0.0006(11)
Si4 0.0235(15) 0.0204(14) 0.0200(14) -0.0032(12) -0.0007(11) 0.0015(11)
Si5 0.0274(15) 0.0168(14) 0.0250(15) -0.0044(12) 0.0032(12) -0.0012(11)
Si6 0.0244(15) 0.0165(14) 0.0236(15) -0.0050(11) 0.0026(12) -0.0012(11)
Si7 0.0296(16) 0.0208(15) 0.0338(17) -0.0060(13) 0.0036(13) -0.0041(12)
Si8 0.0338(17) 0.0215(15) 0.0293(17) -0.0039(13) -0.0014(13) 0.0022(13)
N1 0.017(4) 0.024(4) 0.026(5) -0.008(4) 0.006(3) -0.004(3)
N2 0.043(6) 0.021(5) 0.022(5) -0.001(4) 0.001(4) 0.002(4)
O1 0.030(4) 0.015(3) 0.017(3) -0.003(3) -0.001(3) 0.005(3)
O2 0.032(4) 0.024(4) 0.019(4) -0.002(3) 0.002(3) -0.001(3)
O3 0.020(4) 0.025(4) 0.021(4) -0.005(3) 0.002(3) 0.000(3)
O4 0.030(4) 0.021(4) 0.020(4) -0.002(3) 0.009(3) -0.007(3)
O5 0.031(4) 0.029(4) 0.035(4) -0.013(3) 0.007(3) -0.003(3)
O6 0.029(4) 0.029(4) 0.031(4) -0.009(3) 0.002(3) -0.001(3)
O7 0.033(4) 0.031(4) 0.019(4) -0.006(3) -0.005(3) 0.001(3)
O8 0.026(4) 0.036(4) 0.043(5) -0.005(4) 0.008(3) 0.005(3)
C1 0.037(6) 0.031(6) 0.029(6) -0.006(5) 0.002(5) 0.004(5)
C2 0.032(6) 0.038(7) 0.027(6) 0.000(5) 0.012(5) -0.002(5)
C3 0.030(6) 0.035(6) 0.027(6) -0.024(5) 0.005(5) -0.007(5)
C4 0.038(7) 0.031(6) 0.026(6) 0.009(5) -0.001(5) 0.010(5)
C5 0.035(6) 0.021(6) 0.040(7) -0.013(5) -0.001(5) 0.005(5)
C6 0.034(6) 0.028(6) 0.039(7) -0.017(5) 0.006(5) 0.003(5)
C7 0.063(9) 0.036(7) 0.041(8) 0.009(6) -0.004(6) -0.018(6)
C8 0.046(8) 0.031(7) 0.055(8) -0.011(6) -0.005(6) -0.002(6)
C9 0.032(6) 0.037(7) 0.050(8) -0.017(6) 0.004(6) -0.004(5)
C10 0.053(8) 0.026(6) 0.050(8) -0.012(6) -0.006(6) 0.024(6)
C11 0.060(9) 0.034(7) 0.040(7) -0.003(6) -0.002(6) -0.006(6)
C12 0.032(6) 0.044(7) 0.037(7) -0.008(6) -0.001(5) 0.009(5)
C13 0.036(6) 0.020(5) 0.029(6) -0.005(5) -0.006(5) -0.003(5)
C14 0.042(7) 0.012(5) 0.025(6) 0.001(4) 0.002(5) -0.001(4)
C15 0.019(5) 0.030(6) 0.025(6) 0.000(5) 0.010(4) 0.005(4)
C16 0.031(6) 0.030(6) 0.025(6) -0.005(5) 0.001(5) -0.005(5)
C17 0.036(6) 0.035(6) 0.012(5) -0.007(5) 0.003(4) -0.005(5)
C18 0.015(5) 0.044(7) 0.033(6) -0.010(5) -0.005(4) -0.002(5)
C19 0.038(6) 0.019(5) 0.032(6) -0.003(5) 0.010(5) -0.002(5)
C20 0.042(7) 0.014(5) 0.032(6) -0.004(5) 0.008(5) 0.007(5)
C21 0.032(6) 0.024(6) 0.034(6) -0.007(5) 0.004(5) 0.002(5)
C22 0.026(6) 0.029(6) 0.045(7) -0.008(5) 0.022(5) 0.001(5)
C23 0.050(8) 0.052(8) 0.028(6) -0.026(6) -0.002(6) 0.015(6)
C24 0.043(7) 0.036(6) 0.024(6) -0.017(5) 0.007(5) -0.003(5)
C25 0.017(5) 0.038(7) 0.043(7) 0.001(5) -0.001(5) 0.004(5)
C26 0.046(7) 0.043(7) 0.044(8) -0.004(6) -0.026(6) -0.007(6)
C27 0.040(7) 0.027(6) 0.035(7) 0.007(5) -0.006(5) 0.000(5)
C28 0.036(6) 0.030(6) 0.032(6) 0.005(5) -0.010(5) 0.001(5)
C29 0.059(8) 0.041(7) 0.027(6) 0.003(6) 0.007(6) -0.018(6)
C30 0.023(6) 0.068(9) 0.032(7) 0.007(6) 0.000(5) 0.009(6)
C31 0.049(8) 0.062(9) 0.043(8) 0.011(7) 0.015(6) -0.002(7)
C32 0.021(5) 0.028(6) 0.039(7) -0.009(5) -0.002(5) 0.015(4)
 
_geom_special_details
;
 All esds (except the esd in the dihedral angle between two l.s. planes)
 are estimated using the full covariance matrix.  The cell esds are taken
 into account individually in the estimation of esds in distances, angles
 and torsion angles; correlations between esds in cell parameters are only
 used when they are defined by crystal symmetry.  An approximate (isotropic)
 treatment of cell esds is used for estimating esds involving l.s. planes.
;
 
loop_
 _geom_bond_atom_site_label_1
 _geom_bond_atom_site_label_2
 _geom_bond_distance
 _geom_bond_site_symmetry_2
 _geom_bond_publ_flag
Yb1 O8 2.410(7) . ?
Yb1 O1 2.436(6) . ?
Yb1 O7 2.454(7) . ?
Yb1 O4 2.510(6) . ?
Yb1 Si1 3.018(3) . ?
Yb1 Si5 3.032(3) . ?
Yb1 Si6 3.438(3) . ?
Yb1 Si3 3.464(3) . ?
Si1 Si2 2.325(4) . ?
Si1 Si3 2.329(4) . ?
Si1 Si4 2.339(4) . ?
Si2 C1 1.891(10) . ?
Si2 C3 1.904(9) . ?
Si2 C2 1.904(10) . ?
Si3 O3 1.642(7) . ?
Si3 O2 1.648(7) . ?
Si3 O1 1.701(7) . ?
Si4 C6 1.870(10) . ?
Si4 C5 1.879(10) . ?
Si4 C4 1.895(10) . ?
Si5 Si6 2.319(4) . ?
Si5 Si7 2.335(4) . ?
Si5 Si8 2.346(4) . ?
Si6 O6 1.649(7) . ?
Si6 O5 1.653(8) . ?
Si6 O4 1.713(7) . ?
Si7 C8 1.874(12) . ?
Si7 C7 1.880(12) . ?
Si7 C9 1.895(11) . ?
Si8 C12 1.875(11) . ?
Si8 C10 1.884(11) . ?
Si8 C11 1.898(12) . ?
N1 C17 1.452(12) . ?
N1 C16 1.453(12) . ?
N1 C14 1.467(12) . ?
N2 C22 1.441(13) . ?
N2 C23 1.454(14) . ?
N2 C20 1.456(12) . ?
O1 C13 1.452(11) . ?
O2 C15 1.433(11) . ?
O3 C18 1.437(12) . ?
O4 C19 1.443(12) . ?
O5 C24 1.413(12) . ?
O6 C21 1.415(12) . ?
O7 C28 1.437(12) . ?
O7 C25 1.439(12) . ?
O8 C29 1.429(12) . ?
O8 C32 1.469(11) . ?
C13 C14 1.508(14) . ?
C15 C16 1.531(14) . ?
C17 C18 1.529(14) . ?
C19 C20 1.507(14) . ?
C21 C22 1.540(15) . ?
C23 C24 1.534(16) . ?
C25 C26 1.486(15) . ?
C26 C27 1.540(15) . ?
C27 C28 1.487(15) . ?
C29 C31 1.492(17) . ?
C30 C31 1.469(17) . ?
C30 C32 1.521(14) . ?
 
loop_
 _geom_angle_atom_site_label_1
 _geom_angle_atom_site_label_2
 _geom_angle_atom_site_label_3
 _geom_angle
 _geom_angle_site_symmetry_1
 _geom_angle_site_symmetry_3
 _geom_angle_publ_flag
O8 Yb1 O1 81.8(2) . . ?
O8 Yb1 O7 78.7(2) . . ?
O1 Yb1 O7 151.0(2) . . ?
O8 Yb1 O4 153.8(2) . . ?
O1 Yb1 O4 122.4(2) . . ?
O7 Yb1 O4 81.8(2) . . ?
O8 Yb1 Si1 102.61(19) . . ?
O1 Yb1 Si1 66.88(15) . . ?
O7 Yb1 Si1 96.76(17) . . ?
O4 Yb1 Si1 96.78(15) . . ?
O8 Yb1 Si5 99.81(18) . . ?
O1 Yb1 Si5 98.14(15) . . ?
O7 Yb1 Si5 106.14(17) . . ?
O4 Yb1 Si5 69.21(15) . . ?
Si1 Yb1 Si5 150.60(8) . . ?
O8 Yb1 Si6 132.99(19) . . ?
O1 Yb1 Si6 121.10(15) . . ?
O7 Yb1 Si6 87.88(16) . . ?
O4 Yb1 Si6 28.37(15) . . ?
Si1 Yb1 Si6 123.75(7) . . ?
Si5 Yb1 Si6 41.41(7) . . ?
O8 Yb1 Si3 83.18(19) . . ?
O1 Yb1 Si3 26.97(15) . . ?
O7 Yb1 Si3 128.24(17) . . ?
O4 Yb1 Si3 122.80(15) . . ?
Si1 Yb1 Si3 41.41(7) . . ?
Si5 Yb1 Si3 124.63(7) . . ?
Si6 Yb1 Si3 136.50(6) . . ?
Si2 Si1 Si3 98.28(14) . . ?
Si2 Si1 Si4 106.49(14) . . ?
Si3 Si1 Si4 109.33(14) . . ?
Si2 Si1 Yb1 110.60(12) . . ?
Si3 Si1 Yb1 79.60(10) . . ?
Si4 Si1 Yb1 140.09(13) . . ?
C1 Si2 C3 110.4(5) . . ?
C1 Si2 C2 105.4(5) . . ?
C3 Si2 C2 104.7(5) . . ?
C1 Si2 Si1 108.3(4) . . ?
C3 Si2 Si1 115.6(3) . . ?
C2 Si2 Si1 112.0(4) . . ?
O3 Si3 O2 112.2(4) . . ?
O3 Si3 O1 109.4(3) . . ?
O2 Si3 O1 112.5(3) . . ?
O3 Si3 Si1 115.0(3) . . ?
O2 Si3 Si1 109.9(3) . . ?
O1 Si3 Si1 96.9(2) . . ?
O3 Si3 Yb1 135.9(3) . . ?
O2 Si3 Yb1 110.1(3) . . ?
O1 Si3 Yb1 40.5(2) . . ?
Si1 Si3 Yb1 58.99(9) . . ?
C6 Si4 C5 107.1(5) . . ?
C6 Si4 C4 106.7(5) . . ?
C5 Si4 C4 107.0(5) . . ?
C6 Si4 Si1 116.3(4) . . ?
C5 Si4 Si1 109.7(3) . . ?
C4 Si4 Si1 109.7(4) . . ?
Si6 Si5 Si7 101.25(15) . . ?
Si6 Si5 Si8 100.00(15) . . ?
Si7 Si5 Si8 105.36(15) . . ?
Si6 Si5 Yb1 78.73(10) . . ?
Si7 Si5 Yb1 131.52(13) . . ?
Si8 Si5 Yb1 122.56(13) . . ?
O6 Si6 O5 113.5(4) . . ?
O6 Si6 O4 110.4(4) . . ?
O5 Si6 O4 106.7(4) . . ?
O6 Si6 Si5 111.1(3) . . ?
O5 Si6 Si5 111.7(3) . . ?
O4 Si6 Si5 102.9(3) . . ?
O6 Si6 Yb1 132.8(3) . . ?
O5 Si6 Yb1 112.4(3) . . ?
O4 Si6 Yb1 44.1(2) . . ?
Si5 Si6 Yb1 59.86(9) . . ?
C8 Si7 C7 107.7(6) . . ?
C8 Si7 C9 105.4(5) . . ?
C7 Si7 C9 105.4(6) . . ?
C8 Si7 Si5 115.4(4) . . ?
C7 Si7 Si5 110.0(4) . . ?
C9 Si7 Si5 112.4(4) . . ?
C12 Si8 C10 105.9(5) . . ?
C12 Si8 C11 107.3(5) . . ?
C10 Si8 C11 106.3(5) . . ?
C12 Si8 Si5 111.2(4) . . ?
C10 Si8 Si5 116.2(4) . . ?
C11 Si8 Si5 109.5(4) . . ?
C17 N1 C16 117.3(8) . . ?
C17 N1 C14 117.5(8) . . ?
C16 N1 C14 120.0(8) . . ?
C22 N2 C23 120.2(9) . . ?
C22 N2 C20 119.3(9) . . ?
C23 N2 C20 117.8(9) . . ?
C13 O1 Si3 124.8(6) . . ?
C13 O1 Yb1 122.3(5) . . ?
Si3 O1 Yb1 112.5(3) . . ?
C15 O2 Si3 127.4(6) . . ?
C18 O3 Si3 125.3(6) . . ?
C19 O4 Si6 124.4(6) . . ?
C19 O4 Yb1 114.5(5) . . ?
Si6 O4 Yb1 107.5(3) . . ?
C24 O5 Si6 125.2(7) . . ?
C21 O6 Si6 127.1(6) . . ?
C28 O7 C25 108.5(7) . . ?
C28 O7 Yb1 131.8(6) . . ?
C25 O7 Yb1 119.4(6) . . ?
C29 O8 C32 104.3(8) . . ?
C29 O8 Yb1 134.7(7) . . ?
C32 O8 Yb1 118.9(6) . . ?
O1 C13 C14 111.1(8) . . ?
N1 C14 C13 108.0(8) . . ?
O2 C15 C16 110.2(8) . . ?
N1 C16 C15 107.8(8) . . ?
N1 C17 C18 107.3(8) . . ?
O3 C18 C17 110.3(8) . . ?
O4 C19 C20 111.9(8) . . ?
N2 C20 C19 111.0(8) . . ?
O6 C21 C22 110.0(9) . . ?
N2 C22 C21 107.9(8) . . ?
N2 C23 C24 109.1(9) . . ?
O5 C24 C23 110.9(8) . . ?
O7 C25 C26 108.6(9) . . ?
C25 C26 C27 101.8(9) . . ?
C28 C27 C26 103.1(9) . . ?
O7 C28 C27 104.6(9) . . ?
O8 C29 C31 106.3(10) . . ?
C31 C30 C32 104.5(10) . . ?
C30 C31 C29 105.4(10) . . ?
O8 C32 C30 107.7(9) . . ?
 
loop_
 _geom_torsion_atom_site_label_1
 _geom_torsion_atom_site_label_2
 _geom_torsion_atom_site_label_3
 _geom_torsion_atom_site_label_4
 _geom_torsion
 _geom_torsion_site_symmetry_1
 _geom_torsion_site_symmetry_2
 _geom_torsion_site_symmetry_3
 _geom_torsion_site_symmetry_4
 _geom_torsion_publ_flag
O8 Yb1 Si1 Si2 -159.1(2) . . . . ?
O1 Yb1 Si1 Si2 -83.8(2) . . . . ?
O7 Yb1 Si1 Si2 121.1(2) . . . . ?
O4 Yb1 Si1 Si2 38.6(2) . . . . ?
Si5 Yb1 Si1 Si2 -20.2(2) . . . . ?
Si6 Yb1 Si1 Si2 29.12(15) . . . . ?
Si3 Yb1 Si1 Si2 -95.02(15) . . . . ?
O8 Yb1 Si1 Si3 -64.0(2) . . . . ?
O1 Yb1 Si1 Si3 11.17(18) . . . . ?
O7 Yb1 Si1 Si3 -143.89(18) . . . . ?
O4 Yb1 Si1 Si3 133.64(18) . . . . ?
Si5 Yb1 Si1 Si3 74.79(17) . . . . ?
Si6 Yb1 Si1 Si3 124.14(10) . . . . ?
O8 Yb1 Si1 Si4 43.7(3) . . . . ?
O1 Yb1 Si1 Si4 118.9(3) . . . . ?
O7 Yb1 Si1 Si4 -36.1(3) . . . . ?
O4 Yb1 Si1 Si4 -118.6(2) . . . . ?
Si5 Yb1 Si1 Si4 -177.44(17) . . . . ?
Si6 Yb1 Si1 Si4 -128.10(19) . . . . ?
Si3 Yb1 Si1 Si4 107.8(2) . . . . ?
Si3 Si1 Si2 C1 -57.4(4) . . . . ?
Si4 Si1 Si2 C1 -170.5(4) . . . . ?
Yb1 Si1 Si2 C1 24.5(4) . . . . ?
Si3 Si1 Si2 C3 67.0(4) . . . . ?
Si4 Si1 Si2 C3 -46.0(4) . . . . ?
Yb1 Si1 Si2 C3 149.0(4) . . . . ?
Si3 Si1 Si2 C2 -173.2(4) . . . . ?
Si4 Si1 Si2 C2 73.7(4) . . . . ?
Yb1 Si1 Si2 C2 -91.3(4) . . . . ?
Si2 Si1 Si3 O3 -20.6(3) . . . . ?
Si4 Si1 Si3 O3 90.2(3) . . . . ?
Yb1 Si1 Si3 O3 -130.1(3) . . . . ?
Si2 Si1 Si3 O2 -148.4(3) . . . . ?
Si4 Si1 Si3 O2 -37.6(3) . . . . ?
Yb1 Si1 Si3 O2 102.1(3) . . . . ?
Si2 Si1 Si3 O1 94.7(3) . . . . ?
Si4 Si1 Si3 O1 -154.5(3) . . . . ?
Yb1 Si1 Si3 O1 -14.9(2) . . . . ?
Si2 Si1 Si3 Yb1 109.56(12) . . . . ?
Si4 Si1 Si3 Yb1 -139.65(14) . . . . ?
O8 Yb1 Si3 O3 -147.0(4) . . . . ?
O1 Yb1 Si3 O3 -61.8(5) . . . . ?
O7 Yb1 Si3 O3 143.3(4) . . . . ?
O4 Yb1 Si3 O3 36.3(4) . . . . ?
Si1 Yb1 Si3 O3 95.1(4) . . . . ?
Si5 Yb1 Si3 O3 -49.8(4) . . . . ?
Si6 Yb1 Si3 O3 3.6(4) . . . . ?
O8 Yb1 Si3 O2 16.2(3) . . . . ?
O1 Yb1 Si3 O2 101.4(4) . . . . ?
O7 Yb1 Si3 O2 -53.6(3) . . . . ?
O4 Yb1 Si3 O2 -160.5(3) . . . . ?
Si1 Yb1 Si3 O2 -101.7(3) . . . . ?
Si5 Yb1 Si3 O2 113.4(3) . . . . ?
Si6 Yb1 Si3 O2 166.8(3) . . . . ?
O8 Yb1 Si3 O1 -85.2(4) . . . . ?
O7 Yb1 Si3 O1 -155.0(4) . . . . ?
O4 Yb1 Si3 O1 98.1(4) . . . . ?
Si1 Yb1 Si3 O1 156.9(4) . . . . ?
Si5 Yb1 Si3 O1 12.0(4) . . . . ?
Si6 Yb1 Si3 O1 65.4(4) . . . . ?
O8 Yb1 Si3 Si1 117.9(2) . . . . ?
O1 Yb1 Si3 Si1 -156.9(4) . . . . ?
O7 Yb1 Si3 Si1 48.2(2) . . . . ?
O4 Yb1 Si3 Si1 -58.8(2) . . . . ?
Si5 Yb1 Si3 Si1 -144.85(11) . . . . ?
Si6 Yb1 Si3 Si1 -91.46(12) . . . . ?
Si2 Si1 Si4 C6 86.0(4) . . . . ?
Si3 Si1 Si4 C6 -19.3(4) . . . . ?
Yb1 Si1 Si4 C6 -116.2(4) . . . . ?
Si2 Si1 Si4 C5 -152.3(4) . . . . ?
Si3 Si1 Si4 C5 102.4(4) . . . . ?
Yb1 Si1 Si4 C5 5.5(4) . . . . ?
Si2 Si1 Si4 C4 -35.1(4) . . . . ?
Si3 Si1 Si4 C4 -140.4(4) . . . . ?
Yb1 Si1 Si4 C4 122.7(4) . . . . ?
O8 Yb1 Si5 Si6 -148.2(2) . . . . ?
O1 Yb1 Si5 Si6 128.81(18) . . . . ?
O7 Yb1 Si5 Si6 -67.28(19) . . . . ?
O4 Yb1 Si5 Si6 7.10(18) . . . . ?
Si1 Yb1 Si5 Si6 72.47(18) . . . . ?
Si3 Yb1 Si5 Si6 123.34(10) . . . . ?
O8 Yb1 Si5 Si7 -53.1(3) . . . . ?
O1 Yb1 Si5 Si7 -136.1(2) . . . . ?
O7 Yb1 Si5 Si7 27.8(2) . . . . ?
O4 Yb1 Si5 Si7 102.2(2) . . . . ?
Si1 Yb1 Si5 Si7 167.59(15) . . . . ?
Si6 Yb1 Si5 Si7 95.1(2) . . . . ?
Si3 Yb1 Si5 Si7 -141.54(16) . . . . ?
O8 Yb1 Si5 Si8 117.0(2) . . . . ?
O1 Yb1 Si5 Si8 34.1(2) . . . . ?
O7 Yb1 Si5 Si8 -162.0(2) . . . . ?
O4 Yb1 Si5 Si8 -87.6(2) . . . . ?
Si1 Yb1 Si5 Si8 -22.3(2) . . . . ?
Si6 Yb1 Si5 Si8 -94.75(17) . . . . ?
Si3 Yb1 Si5 Si8 28.59(18) . . . . ?
Si7 Si5 Si6 O6 101.3(3) . . . . ?
Si8 Si5 Si6 O6 -6.7(3) . . . . ?
Yb1 Si5 Si6 O6 -128.2(3) . . . . ?
Si7 Si5 Si6 O5 -26.5(3) . . . . ?
Si8 Si5 Si6 O5 -134.5(3) . . . . ?
Yb1 Si5 Si6 O5 104.0(3) . . . . ?
Si7 Si5 Si6 O4 -140.5(3) . . . . ?
Si8 Si5 Si6 O4 111.5(3) . . . . ?
Yb1 Si5 Si6 O4 -10.0(3) . . . . ?
Si7 Si5 Si6 Yb1 -130.51(14) . . . . ?
Si8 Si5 Si6 Yb1 121.48(13) . . . . ?
O8 Yb1 Si6 O6 136.9(4) . . . . ?
O1 Yb1 Si6 O6 27.4(4) . . . . ?
O7 Yb1 Si6 O6 -150.8(4) . . . . ?
O4 Yb1 Si6 O6 -74.3(5) . . . . ?
Si1 Yb1 Si6 O6 -54.1(4) . . . . ?
Si5 Yb1 Si6 O6 91.7(4) . . . . ?
Si3 Yb1 Si6 O6 -1.4(4) . . . . ?
O8 Yb1 Si6 O5 -57.7(4) . . . . ?
O1 Yb1 Si6 O5 -167.2(3) . . . . ?
O7 Yb1 Si6 O5 14.6(3) . . . . ?
O4 Yb1 Si6 O5 91.2(4) . . . . ?
Si1 Yb1 Si6 O5 111.4(3) . . . . ?
Si5 Yb1 Si6 O5 -102.9(3) . . . . ?
Si3 Yb1 Si6 O5 164.0(3) . . . . ?
O8 Yb1 Si6 O4 -148.9(4) . . . . ?
O1 Yb1 Si6 O4 101.6(4) . . . . ?
O7 Yb1 Si6 O4 -76.5(4) . . . . ?
Si1 Yb1 Si6 O4 20.2(4) . . . . ?
Si5 Yb1 Si6 O4 165.9(4) . . . . ?
Si3 Yb1 Si6 O4 72.9(4) . . . . ?
O8 Yb1 Si6 Si5 45.2(3) . . . . ?
O1 Yb1 Si6 Si5 -64.3(2) . . . . ?
O7 Yb1 Si6 Si5 117.54(19) . . . . ?
O4 Yb1 Si6 Si5 -165.9(4) . . . . ?
Si1 Yb1 Si6 Si5 -145.74(11) . . . . ?
Si3 Yb1 Si6 Si5 -93.06(13) . . . . ?
Si6 Si5 Si7 C8 -41.0(5) . . . . ?
Si8 Si5 Si7 C8 62.8(5) . . . . ?
Yb1 Si5 Si7 C8 -125.8(5) . . . . ?
Si6 Si5 Si7 C7 -163.0(5) . . . . ?
Si8 Si5 Si7 C7 -59.3(5) . . . . ?
Yb1 Si5 Si7 C7 112.1(5) . . . . ?
Si6 Si5 Si7 C9 79.8(4) . . . . ?
Si8 Si5 Si7 C9 -176.4(4) . . . . ?
Yb1 Si5 Si7 C9 -5.0(5) . . . . ?
Si6 Si5 Si8 C12 -57.5(4) . . . . ?
Si7 Si5 Si8 C12 -162.2(4) . . . . ?
Yb1 Si5 Si8 C12 25.4(4) . . . . ?
Si6 Si5 Si8 C10 63.7(5) . . . . ?
Si7 Si5 Si8 C10 -41.0(5) . . . . ?
Yb1 Si5 Si8 C10 146.6(5) . . . . ?
Si6 Si5 Si8 C11 -175.9(4) . . . . ?
Si7 Si5 Si8 C11 79.4(4) . . . . ?
Yb1 Si5 Si8 C11 -92.9(4) . . . . ?
O3 Si3 O1 C13 -33.9(8) . . . . ?
O2 Si3 O1 C13 91.5(8) . . . . ?
Si1 Si3 O1 C13 -153.6(7) . . . . ?
Yb1 Si3 O1 C13 -173.4(9) . . . . ?
O3 Si3 O1 Yb1 139.5(3) . . . . ?
O2 Si3 O1 Yb1 -95.1(4) . . . . ?
Si1 Si3 O1 Yb1 19.8(3) . . . . ?
O8 Yb1 O1 C13 -95.3(7) . . . . ?
O7 Yb1 O1 C13 -143.2(7) . . . . ?
O4 Yb1 O1 C13 74.0(7) . . . . ?
Si1 Yb1 O1 C13 157.2(7) . . . . ?
Si5 Yb1 O1 C13 3.6(7) . . . . ?
Si6 Yb1 O1 C13 40.6(7) . . . . ?
Si3 Yb1 O1 C13 173.6(9) . . . . ?
O8 Yb1 O1 Si3 91.1(4) . . . . ?
O7 Yb1 O1 Si3 43.2(6) . . . . ?
O4 Yb1 O1 Si3 -99.6(3) . . . . ?
Si1 Yb1 O1 Si3 -16.4(3) . . . . ?
Si5 Yb1 O1 Si3 -170.0(3) . . . . ?
Si6 Yb1 O1 Si3 -133.0(3) . . . . ?
O3 Si3 O2 C15 92.2(8) . . . . ?
O1 Si3 O2 C15 -31.7(9) . . . . ?
Si1 Si3 O2 C15 -138.4(7) . . . . ?
Yb1 Si3 O2 C15 -75.2(8) . . . . ?
O2 Si3 O3 C18 -28.9(9) . . . . ?
O1 Si3 O3 C18 96.7(8) . . . . ?
Si1 Si3 O3 C18 -155.6(7) . . . . ?
Yb1 Si3 O3 C18 134.0(7) . . . . ?
O6 Si6 O4 C19 -90.9(8) . . . . ?
O5 Si6 O4 C19 32.8(8) . . . . ?
Si5 Si6 O4 C19 150.5(7) . . . . ?
Yb1 Si6 O4 C19 138.0(9) . . . . ?
O6 Si6 O4 Yb1 131.1(3) . . . . ?
O5 Si6 O4 Yb1 -105.2(4) . . . . ?
Si5 Si6 O4 Yb1 12.5(3) . . . . ?
O8 Yb1 O4 C19 -83.6(8) . . . . ?
O1 Yb1 O4 C19 121.0(6) . . . . ?
O7 Yb1 O4 C19 -41.7(6) . . . . ?
Si1 Yb1 O4 C19 54.2(6) . . . . ?
Si5 Yb1 O4 C19 -152.5(7) . . . . ?
Si6 Yb1 O4 C19 -142.6(8) . . . . ?
Si3 Yb1 O4 C19 88.9(6) . . . . ?
O8 Yb1 O4 Si6 59.0(7) . . . . ?
O1 Yb1 O4 Si6 -96.4(3) . . . . ?
O7 Yb1 O4 Si6 100.9(3) . . . . ?
Si1 Yb1 O4 Si6 -163.2(3) . . . . ?
Si5 Yb1 O4 Si6 -9.9(3) . . . . ?
Si3 Yb1 O4 Si6 -128.5(3) . . . . ?
O6 Si6 O5 C24 21.1(9) . . . . ?
O4 Si6 O5 C24 -100.7(8) . . . . ?
Si5 Si6 O5 C24 147.6(7) . . . . ?
Yb1 Si6 O5 C24 -147.3(7) . . . . ?
O5 Si6 O6 C21 -92.7(8) . . . . ?
O4 Si6 O6 C21 27.0(9) . . . . ?
Si5 Si6 O6 C21 140.5(7) . . . . ?
Yb1 Si6 O6 C21 72.6(9) . . . . ?
O8 Yb1 O7 C28 -100.8(8) . . . . ?
O1 Yb1 O7 C28 -52.3(10) . . . . ?
O4 Yb1 O7 C28 96.7(8) . . . . ?
Si1 Yb1 O7 C28 0.8(8) . . . . ?
Si5 Yb1 O7 C28 162.2(8) . . . . ?
Si6 Yb1 O7 C28 124.5(8) . . . . ?
Si3 Yb1 O7 C28 -29.0(9) . . . . ?
O8 Yb1 O7 C25 85.3(7) . . . . ?
O1 Yb1 O7 C25 133.8(7) . . . . ?
O4 Yb1 O7 C25 -77.2(7) . . . . ?
Si1 Yb1 O7 C25 -173.1(7) . . . . ?
Si5 Yb1 O7 C25 -11.7(7) . . . . ?
Si6 Yb1 O7 C25 -49.4(7) . . . . ?
Si3 Yb1 O7 C25 157.1(6) . . . . ?
O1 Yb1 O8 C29 105.4(10) . . . . ?
O7 Yb1 O8 C29 -96.1(10) . . . . ?
O4 Yb1 O8 C29 -53.8(12) . . . . ?
Si1 Yb1 O8 C29 169.4(9) . . . . ?
Si5 Yb1 O8 C29 8.5(10) . . . . ?
Si6 Yb1 O8 C29 -19.9(11) . . . . ?
Si3 Yb1 O8 C29 132.6(10) . . . . ?
O1 Yb1 O8 C32 -93.9(7) . . . . ?
O7 Yb1 O8 C32 64.5(7) . . . . ?
O4 Yb1 O8 C32 106.9(8) . . . . ?
Si1 Yb1 O8 C32 -30.0(7) . . . . ?
Si5 Yb1 O8 C32 169.2(7) . . . . ?
Si6 Yb1 O8 C32 140.7(6) . . . . ?
Si3 Yb1 O8 C32 -66.8(7) . . . . ?
Si3 O1 C13 C14 -59.8(10) . . . . ?
Yb1 O1 C13 C14 127.4(7) . . . . ?
C17 N1 C14 C13 75.7(11) . . . . ?
C16 N1 C14 C13 -130.7(9) . . . . ?
O1 C13 C14 N1 51.9(11) . . . . ?
Si3 O2 C15 C16 -59.5(11) . . . . ?
C17 N1 C16 C15 -129.3(9) . . . . ?
C14 N1 C16 C15 76.9(11) . . . . ?
O2 C15 C16 N1 50.5(11) . . . . ?
C16 N1 C17 C18 76.6(10) . . . . ?
C14 N1 C17 C18 -128.9(9) . . . . ?
Si3 O3 C18 C17 -63.2(10) . . . . ?
N1 C17 C18 O3 51.9(10) . . . . ?
Si6 O4 C19 C20 60.3(11) . . . . ?
Yb1 O4 C19 C20 -164.3(7) . . . . ?
C22 N2 C20 C19 125.6(10) . . . . ?
C23 N2 C20 C19 -73.0(12) . . . . ?
O4 C19 C20 N2 -52.2(12) . . . . ?
Si6 O6 C21 C22 66.0(10) . . . . ?
C23 N2 C22 C21 126.0(10) . . . . ?
C20 N2 C22 C21 -73.0(11) . . . . ?
O6 C21 C22 N2 -53.3(11) . . . . ?
C22 N2 C23 C24 -77.1(11) . . . . ?
C20 N2 C23 C24 121.7(10) . . . . ?
Si6 O5 C24 C23 66.9(12) . . . . ?
N2 C23 C24 O5 -51.4(12) . . . . ?
C28 O7 C25 C26 -3.4(12) . . . . ?
Yb1 O7 C25 C26 171.8(7) . . . . ?
O7 C25 C26 C27 -18.8(12) . . . . ?
C25 C26 C27 C28 33.2(12) . . . . ?
C25 O7 C28 C27 25.1(11) . . . . ?
Yb1 O7 C28 C27 -149.2(7) . . . . ?
C26 C27 C28 O7 -36.2(11) . . . . ?
C32 O8 C29 C31 34.2(12) . . . . ?
Yb1 O8 C29 C31 -163.3(8) . . . . ?
C32 C30 C31 C29 17.1(13) . . . . ?
O8 C29 C31 C30 -32.6(14) . . . . ?
C29 O8 C32 C30 -23.2(11) . . . . ?
Yb1 O8 C32 C30 170.9(7) . . . . ?
C31 C30 C32 O8 3.3(12) . . . . ?
 
_diffrn_measured_fraction_theta_max    0.983
_diffrn_reflns_theta_full              26.36
_diffrn_measured_fraction_theta_full   0.983
_refine_diff_density_max    2.273
_refine_diff_density_min   -2.667
_refine_diff_density_rms    0.190

# SQUEEZE RESULTS (APPEND TO CIF)
# Note: Data are Listed for all Voids in the P1 Unit Cell
# i.e. Centre of Gravity, Solvent Accessible Volume,
# Recovered number of Electrons in the Void and
# Details about the Squeezed Material
loop_
  _platon_squeeze_void_nr
  _platon_squeeze_void_average_x
  _platon_squeeze_void_average_y
  _platon_squeeze_void_average_z
  _platon_squeeze_void_volume
  _platon_squeeze_void_count_electrons
  _platon_squeeze_void_content
   1  0.208  0.260  0.743        46         7 ' '
   2  0.307  0.084  0.600        14         2 ' '
   3  0.500  0.500  1.000        71        11 ' '
   4  0.379  0.608  0.521        12         2 ' '
   5  0.500  0.250  0.583         7         1 ' '
   6  0.500  0.750  0.417         7         1 ' '
   7  0.621  0.392  0.479        13         2 ' '
   8  0.792  0.740  0.257        46         7 ' '
   9  0.693  0.916  0.400        14         3 ' '
_platon_squeeze_details
;
;

#===END
